# Supplementary material for: ‘Doctors can’t be doctors all of the time’: a qualitative study of how general practitioners and medical students negotiate public-professional and private-personal realms using social media
Source: PubMed Central journal article supplement — BMJ Open. 2021 Oct 19;11(10):e047991. doi: 10.1136/bmjopen-2020-047991 (PMC8527115; doi:10.1136/bmjopen-2020-047991), 2021-10-19
Supplement: bmjopen-2020-047991.draft_revisions.pdf [file bmjopen-2020-047991.draft_revisions.pdf]

# BMJ Open

BMJ Open is committed to open peer review. As part of this commitment we make the peer review history of every article we publish publicly available.

When an article is published we post the peer reviewers' comments and the authors' responses online. We also post the versions of the paper that were used during peer review. These are the versions that the peer review comments apply to.

The versions of the paper that follow are the versions that were submitted during the peer review process. They are not the versions of record or the final published versions. They should not be cited or distributed as the published version of this manuscript.

BMJ Open is an open access journal and the full, final, typeset and author-corrected version of record of the manuscript is available on our site with no access controls, subscription charges or pay-per-view fees (<http://bmjopen.bmj.com>).

If you have any questions on BMJ Open's open peer review process please email [info.bmjopen@bmj.com](mailto:info.bmjopen@bmj.com)

# BMJ Open

**“Doctors can’t be doctors all of the time”: a qualitative study of how general practitioners and medical students negotiate public- professional and private-personal realms using social media**

|                               |                                                                                                                                                                                                                                                                                                                                                                                                                                                                                                                                                                                                                                                                                                                                                                     |
|-------------------------------|---------------------------------------------------------------------------------------------------------------------------------------------------------------------------------------------------------------------------------------------------------------------------------------------------------------------------------------------------------------------------------------------------------------------------------------------------------------------------------------------------------------------------------------------------------------------------------------------------------------------------------------------------------------------------------------------------------------------------------------------------------------------|
| Journal:                      | <i>BMJ Open</i>                                                                                                                                                                                                                                                                                                                                                                                                                                                                                                                                                                                                                                                                                                                                                     |
| Manuscript ID                 | bmjopen-2020-047991                                                                                                                                                                                                                                                                                                                                                                                                                                                                                                                                                                                                                                                                                                                                                 |
| Article Type:                 | Original research                                                                                                                                                                                                                                                                                                                                                                                                                                                                                                                                                                                                                                                                                                                                                   |
| Date Submitted by the Author: | 16-Dec-2020                                                                                                                                                                                                                                                                                                                                                                                                                                                                                                                                                                                                                                                                                                                                                         |
| Complete List of Authors:     | <p>Marshal, Megan; Health Research Institute, University of Limerick School of Medicine</p> <p>Niranjan, Vikram; Health Research Institute, University of Limerick School of Medicine</p> <p>Spain, Eimear; Health Research Institute, University of Limerick School of Medicine</p> <p>MacDonagh, Joe; Technical University Dublin, School of Business and Humanities</p> <p>O'Doherty, Jane; Health Research Institute, University of Limerick School of Medicine</p> <p>O'Connor, Raymond; Health Research Institute, University of Limerick School of Medicine, Graduate Entry Medical School</p> <p>O'Regan, Andrew; University of Limerick Faculty of Education and Health Sciences, Health Research Institute, University of Limerick School of Medicine</p> |
| Keywords:                     | PRIMARY CARE, MEDICAL EDUCATION & TRAINING, MEDICAL ETHICS                                                                                                                                                                                                                                                                                                                                                                                                                                                                                                                                                                                                                                                                                                          |
|                               |                                                                                                                                                                                                                                                                                                                                                                                                                                                                                                                                                                                                                                                                                                                                                                     |

SCHOLARONE™  
Manuscripts

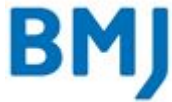

I, the Submitting Author has the right to grant and does grant on behalf of all authors of the Work (as defined in the below author licence), an exclusive licence and/or a non-exclusive licence for contributions from authors who are: i) UK Crown employees; ii) where BMJ has agreed a CC-BY licence shall apply, and/or iii) in accordance with the terms applicable for US Federal Government officers or employees acting as part of their official duties; on a worldwide, perpetual, irrevocable, royalty-free basis to BMJ Publishing Group Ltd ("BMJ") its licensees and where the relevant Journal is co-owned by BMJ to the co-owners of the Journal, to publish the Work in this journal and any other BMJ products and to exploit all rights, as set out in our [licence](#).

The Submitting Author accepts and understands that any supply made under these terms is made by BMJ to the Submitting Author unless you are acting as an employee on behalf of your employer or a postgraduate student of an affiliated institution which is paying any applicable article publishing charge ("APC") for Open Access articles. Where the Submitting Author wishes to make the Work available on an Open Access basis (and intends to pay the relevant APC), the terms of reuse of such Open Access shall be governed by a Creative Commons licence – details of these licences and which [Creative Commons](#) licence will apply to this Work are set out in our licence referred to above.

Other than as permitted in any relevant BMJ Author's Self Archiving Policies, I confirm this Work has not been accepted for publication elsewhere, is not being considered for publication elsewhere and does not duplicate material already published. I confirm all authors consent to publication of this Work and authorise the granting of this licence.

## Title page

# “Doctors can’t be doctors all of the time”: a qualitative study of how general practitioners and medical students negotiate public-professional and private-personal realms using social media

M Marshall<sup>1</sup>, V Niranjana<sup>1</sup>, E Spain<sup>1</sup>, J MacDonagh<sup>2</sup>, J O’Doherty<sup>1</sup>, R O’Connor<sup>1</sup>, \*A O’Regan<sup>1</sup>

\*corresponding author Dr Andrew O’Regan, address: School of Medicine, University of Limerick, Limerick, Ireland; email- [andrew.oregan@ul.ie](mailto:andrew.oregan@ul.ie); phone – 00353-646634111

<sup>1</sup> Health Research Institute University of Limerick School of Medicine, Limerick, Ireland

<sup>2</sup> School of Business & Humanities, Technological University Dublin, Ireland

Key words – General Practice, Social media, online professionalism, medical education

Manuscript word count – 3,963

## Abstract

**Objective-** The objective of this study was to explore the experiences and perspectives of general practitioners and medical students use of and behaviour on social media and, specifically, to understand how they negotiate threats to professional and personal life on social media.

**Design-** A two phase qualitative design was employed, consisting of semi-structured interviews and follow-up vignettes, where participants were asked to respond to vignettes that involved unprofessional behaviour to varying degrees. Data were analysed using template analysis.

1  
2  
3  
4 **Setting and Participants-** Participants were general practitioner tutors and third year medical students  
5 who had just completed placement on the University of Limerick longitudinal integrated clerkship.  
6 Five students and three general practitioners affiliated with a medical school were invited to  
7 participate in one-to-one interviews.  
8  
9

10 **Results** – three overarching themes, each containing subthemes were reported. ‘The world has got  
11 smaller’ shows how platforms provide useful resources and illustrates the potential risks of social  
12 media. ‘Online persona’ considers changing relationships to which advances in social media have  
13 contributed. ‘Towards standards and safety’ conveys how to protect patients, doctors and the  
14 profession.  
15  
16  
17  
18

19 **Conclusion** - Guidance is required for students and medical practitioners on how to establish  
20 reasonable boundaries between their personal and professional presence on social media and in their  
21 right to a private life in which ineffective use of social media does not negatively affect career  
22 prospects.  
23  
24  
25  
26  
27  
28

### 29 **Strengths and Weaknesses of the Study**

30  
31 This study has provided new insights into boundary setting and safe negotiation on social media  
32 platforms for medical students and physicians  
33  
34

35 The analysis addresses a knowledge gap rationalising the differences in attitude between students and  
36 tutors to online professional behaviour  
37  
38

39 The purposive sampling method facilitated a balance of students and GP-tutors, European and North  
40 American students and male and female participants  
41  
42

43 The study was limited to one cohort of medical students in a single medical school  
44  
45

## 46 **Introduction**

47  
48  
49 Medical professional bodies in Europe and the USA have issued position statements and guidelines  
50 for their members advising on how best to utilise social media [1, 2]]. The term social media, itself, is  
51 difficult to define but a commonly accepted description as that of a set of online applications, including  
52 blogging and networking sites, that facilitate users to express themselves and interact with each other  
53 [3]. Social media has become an effective communication tool for public health [4], helping patients  
54 with chronic illness to self-care [5], and more recently, as a means get information to populations in  
55 ‘real-time’ during the COVID-19 pandemic [6].  
56  
57  
58  
59  
60

1  
2  
3 While social media can improve communication in some instances, the associated environment is  
4 fraught with the danger of suboptimal communication [7]. A comprehensive review warned that, for  
5 health professionals and patients, social media can negatively impact on mental health,  
6 confidentiality, privacy and quality of information available [8]. The concept of 'online  
7 professionalism', rooted in the traditional values of medicine, has evolved in the past decade in  
8 response to the challenges of the constantly changing social media sphere [9].  
9

10  
11  
12  
13  
14 Physicians being disciplined by regulatory bodies for unprofessional online behaviour [10] is a cause  
15 for concern for students, physicians and medical educators. An international study of doctors and  
16 medical students reported widespread use of social media, and almost one fifth of students admitted  
17 to sharing clinical images inappropriately [11]. Similarly, surveys of medical students in Australia [12],  
18 England [13] and the USA [14] reported that inappropriate and unprofessional social media posting  
19 was common. This raises the question of whether there is an effect for age in the use of social media  
20 and whether younger medical professionals and those currently in training need to be educated in the  
21 ethical and professional implications of using social media both in their clinical practice and in their  
22 personal lives and particularly where these two areas may overlap. Ethical concerns also concern the  
23 public-professional and private-personal spheres.  
24  
25  
26  
27  
28  
29

30  
31  
32  
33  
34  
35  
36  
37  
38  
39  
40  
41  
42  
43  
44  
45  
46  
47  
48  
49  
50  
51  
52  
53  
54  
55  
56  
57  
58  
59  
60  
61  
62  
63  
64  
65  
66  
67  
68  
69  
70  
71  
72  
73  
74  
75  
76  
77  
78  
79  
80  
81  
82  
83  
84  
85  
86  
87  
88  
89  
90  
91  
92  
93  
94  
95  
96  
97  
98  
99  
100  
101  
102  
103  
104  
105  
106  
107  
108  
109  
110  
111  
112  
113  
114  
115  
116  
117  
118  
119  
120  
121  
122  
123  
124  
125  
126  
127  
128  
129  
130  
131  
132  
133  
134  
135  
136  
137  
138  
139  
140  
141  
142  
143  
144  
145  
146  
147  
148  
149  
150  
151  
152  
153  
154  
155  
156  
157  
158  
159  
160  
161  
162  
163  
164  
165  
166  
167  
168  
169  
170  
171  
172  
173  
174  
175  
176  
177  
178  
179  
180  
181  
182  
183  
184  
185  
186  
187  
188  
189  
190  
191  
192  
193  
194  
195  
196  
197  
198  
199  
200  
201  
202  
203  
204  
205  
206  
207  
208  
209  
210  
211  
212  
213  
214  
215  
216  
217  
218  
219  
220  
221  
222  
223  
224  
225  
226  
227  
228  
229  
230  
231  
232  
233  
234  
235  
236  
237  
238  
239  
240  
241  
242  
243  
244  
245  
246  
247  
248  
249  
250  
251  
252  
253  
254  
255  
256  
257  
258  
259  
260  
261  
262  
263  
264  
265  
266  
267  
268  
269  
270  
271  
272  
273  
274  
275  
276  
277  
278  
279  
280  
281  
282  
283  
284  
285  
286  
287  
288  
289  
290  
291  
292  
293  
294  
295  
296  
297  
298  
299  
300  
301  
302  
303  
304  
305  
306  
307  
308  
309  
310  
311  
312  
313  
314  
315  
316  
317  
318  
319  
320  
321  
322  
323  
324  
325  
326  
327  
328  
329  
330  
331  
332  
333  
334  
335  
336  
337  
338  
339  
340  
341  
342  
343  
344  
345  
346  
347  
348  
349  
350  
351  
352  
353  
354  
355  
356  
357  
358  
359  
360  
361  
362  
363  
364  
365  
366  
367  
368  
369  
370  
371  
372  
373  
374  
375  
376  
377  
378  
379  
380  
381  
382  
383  
384  
385  
386  
387  
388  
389  
390  
391  
392  
393  
394  
395  
396  
397  
398  
399  
400  
401  
402  
403  
404  
405  
406  
407  
408  
409  
410  
411  
412  
413  
414  
415  
416  
417  
418  
419  
420  
421  
422  
423  
424  
425  
426  
427  
428  
429  
430  
431  
432  
433  
434  
435  
436  
437  
438  
439  
440  
441  
442  
443  
444  
445  
446  
447  
448  
449  
450  
451  
452  
453  
454  
455  
456  
457  
458  
459  
460  
461  
462  
463  
464  
465  
466  
467  
468  
469  
470  
471  
472  
473  
474  
475  
476  
477  
478  
479  
480  
481  
482  
483  
484  
485  
486  
487  
488  
489  
490  
491  
492  
493  
494  
495  
496  
497  
498  
499  
500  
501  
502  
503  
504  
505  
506  
507  
508  
509  
510  
511  
512  
513  
514  
515  
516  
517  
518  
519  
520  
521  
522  
523  
524  
525  
526  
527  
528  
529  
530  
531  
532  
533  
534  
535  
536  
537  
538  
539  
540  
541  
542  
543  
544  
545  
546  
547  
548  
549  
550  
551  
552  
553  
554  
555  
556  
557  
558  
559  
560  
561  
562  
563  
564  
565  
566  
567  
568  
569  
570  
571  
572  
573  
574  
575  
576  
577  
578  
579  
580  
581  
582  
583  
584  
585  
586  
587  
588  
589  
590  
591  
592  
593  
594  
595  
596  
597  
598  
599  
600  
601  
602  
603  
604  
605  
606  
607  
608  
609  
610  
611  
612  
613  
614  
615  
616  
617  
618  
619  
620  
621  
622  
623  
624  
625  
626  
627  
628  
629  
630  
631  
632  
633  
634  
635  
636  
637  
638  
639  
640  
641  
642  
643  
644  
645  
646  
647  
648  
649  
650  
651  
652  
653  
654  
655  
656  
657  
658  
659  
660  
661  
662  
663  
664  
665  
666  
667  
668  
669  
670  
671  
672  
673  
674  
675  
676  
677  
678  
679  
680  
681  
682  
683  
684  
685  
686  
687  
688  
689  
690  
691  
692  
693  
694  
695  
696  
697  
698  
699  
700  
701  
702  
703  
704  
705  
706  
707  
708  
709  
710  
711  
712  
713  
714  
715  
716  
717  
718  
719  
720  
721  
722  
723  
724  
725  
726  
727  
728  
729  
730  
731  
732  
733  
734  
735  
736  
737  
738  
739  
740  
741  
742  
743  
744  
745  
746  
747  
748  
749  
750  
751  
752  
753  
754  
755  
756  
757  
758  
759  
760  
761  
762  
763  
764  
765  
766  
767  
768  
769  
770  
771  
772  
773  
774  
775  
776  
777  
778  
779  
780  
781  
782  
783  
784  
785  
786  
787  
788  
789  
790  
791  
792  
793  
794  
795  
796  
797  
798  
799  
800  
801  
802  
803  
804  
805  
806  
807  
808  
809  
810  
811  
812  
813  
814  
815  
816  
817  
818  
819  
820  
821  
822  
823  
824  
825  
826  
827  
828  
829  
830  
831  
832  
833  
834  
835  
836  
837  
838  
839  
840  
841  
842  
843  
844  
845  
846  
847  
848  
849  
850  
851  
852  
853  
854  
855  
856  
857  
858  
859  
860  
861  
862  
863  
864  
865  
866  
867  
868  
869  
870  
871  
872  
873  
874  
875  
876  
877  
878  
879  
880  
881  
882  
883  
884  
885  
886  
887  
888  
889  
890  
891  
892  
893  
894  
895  
896  
897  
898  
899  
900  
901  
902  
903  
904  
905  
906  
907  
908  
909  
910  
911  
912  
913  
914  
915  
916  
917  
918  
919  
920  
921  
922  
923  
924  
925  
926  
927  
928  
929  
930  
931  
932  
933  
934  
935  
936  
937  
938  
939  
940  
941  
942  
943  
944  
945  
946  
947  
948  
949  
950  
951  
952  
953  
954  
955  
956  
957  
958  
959  
960  
961  
962  
963  
964  
965  
966  
967  
968  
969  
970  
971  
972  
973  
974  
975  
976  
977  
978  
979  
980  
981  
982  
983  
984  
985  
986  
987  
988  
989  
990  
991  
992  
993  
994  
995  
996  
997  
998  
999  
1000

Researchers examining the impact of social media on medical professionals called for an intergenerational dialogue [15], as physicians and students may be unsure of the full medical, professional, and personal reputational consequences of the new social media age [16, 17]. While a small number of qualitative studies have been conducted with physicians [18] and medical students [19], there are few qualitative studies examining the views of medical students and those of their clinical supervisors on this topic. This study aimed to address the knowledge gap by investigating the understanding and attitudes of general practitioners (GPs) and medical students to their use of and behaviour on social media.

## Methodology

### Study design

The study adhered to the COREQ [Consolidated criteria for reporting qualitative research] principles for reporting qualitative research (supplementary material 1) [20]. Ethical approval was granted by the University of Limerick Education and Health Science Faculty Ethics Committee [2017\_05\_17\_EHS].

1  
2  
3 Each participant was contacted twice. The first step was an in-depth, semi-structured interview that  
4 was based on a topic guide designed by the research team. The second was a follow-up phone call,  
5 during which, the participant was asked to respond to three separate vignettes which required them  
6 to consider the ethical dilemmas and professional practice challenges of using social media personally  
7 and professionally. The vignettes were chosen as a complementary method because of their ability  
8 to yield rich data [21] and to offer new insights [22].  
9  
10  
11  
12

### 13 **Setting and Participants**

14  
15  
16 Participants were GP tutors and third year medical students who had just completed placement on  
17 the University of Limerick longitudinal integrated clerkship [23]. Purposive, non-probabilistic,  
18 sampling was used to ensure that a balance was achieved between students from Europe and North  
19 America and that both male and females were selected to be as representative as possible of the  
20 student population. Participants were recruited by an email. The sample size was based on the  
21 principle of data saturation, whereby a minimum number of interviews was selected for a first round  
22 of interviews for initial analysis and a minimum number also for subsequent interviews that would be  
23 checked for no new themes emerging; the stopping criterion [24]. Based on previous qualitative  
24 research with medical students [25], we set the initial minimum number at five and specified a  
25 minimum of three subsequent interviews. The characteristics of the participants are outlined in table  
26 1.  
27  
28  
29  
30  
31  
32  
33  
34

### 35 **Public and patient involvement**

36  
37 No patients were involved in the study but the research question was derived from classroom  
38 discussions with the medical students and interactions with GP-tutors, which reflected that this  
39 research area is under-studied. Participants were not involved in the design of the study, recruitment  
40 or conduct of the study. We plan to disseminate the study report as a brief and a full publication to all  
41 the study participants.  
42  
43  
44  
45

46 {Insert table 1 here}  
47  
48  
49  
50  
51  
52  
53

### 54 **Data Collection instruments**

55  
56 The interview guide was developed by an interdisciplinary team, and consisted of open and closed  
57 ended questions. Vignettes were developed by two of the research team with the purpose of exploring  
58 students' and clinicians' responses to examples of unprofessional behaviour online by healthcare  
59  
60

1  
2  
3 workers (supplementary material 2). They were piloted at an academic workshop for health care  
4 educators.  
5

### 6 7 **Interviews and vignettes**

8  
9 Interviews were conducted by a trained female researcher (MM), who would have known some of the  
10 participants and lasted between 15 and 30 minutes. Participants were subsequently invited to a brief  
11 follow-up and a time at least one week later was arranged. These were conducted by telephone and  
12 were digitally recorded, with explicit consent of those participating. Participants were shown or read  
13 short vignettes about use of social media and their opinion were elicited.  
14  
15  
16  
17

### 18 19 **Data analysis**

20  
21 The methodology utilised was template analysis. A coding template based on representative parts of  
22 the data is developed, and, subsequently, is revised and refined [26]. It facilitates the use of a priori  
23 themes which can later be modified or excluded as the data analysis evolves, as the researchers read  
24 and re-read the data. The identification of templates is thus iterative in nature - some are established  
25 initially as more important and then, after thorough reading and re-reading of the data transcripts,  
26 may be seen as less important or more important. This helps to compare perspectives between  
27 different categories of participants; in this case, GPs and medical students [27]. It is a practical method  
28 that is well suited to a team involving multiple coders as it gives the freedom to the team to collaborate  
29 on the direction and content of the coding [28]. The process involved over six meetings of the coders.  
30  
31  
32  
33  
34  
35

36 Coders discussed personal experiences with social media, professional boundaries, and attitudes  
37 towards the scenarios in the vignettes. This “active-acknowledgement”, a recognised reflexivity  
38 technique for overcoming researcher bias in qualitative studies, was maintained throughout the  
39 analysis [29].  
40  
41  
42  
43  
44  
45  
46  
47

## 48 49 **Findings**

50 The analysis produced three overarching themes, each with subthemes that were often  
51 interconnected and, in some cases, had overlapping ideas.  
52  
53  
54  
55

### 56 57 **1. The world has got smaller**



1  
2  
3 This theme refers to the practical, day-to-day applications of social media for medical students and  
4 GPs. It has been divided into two subthemes: 'staying connected' and 'educational tool'.  
5  
6

### 7 **1.1 Staying connected**

8  
9 Maintaining friendships and staying in touch with others was the primary stated use of social media  
10 platforms. A North American student said how helpful Facebook was in keeping touch with family  
11 throughout the world and with a network of friends from a previous course. However, one student  
12 felt that the speed and ease of access may come at the cost of maintaining meaningful relationships.  
13  
14

15  
16  
17 *"perhaps they are superficial relationships, but you know I feel like if I didn't have 'Facebook',*  
18 *particularly I would absolutely lose contact with these people."* [student]  
19

20  
21 There appeared to be an awareness of the link between social media misuse and being compromised  
22 when interviewing for jobs or being publicly castigated for holding the 'wrong' view on a contentious  
23 topic.  
24

25  
26  
27 *"I am very conscious about putting up things like my date of birth, things about politics... of not giving*  
28 *away too much about myself."* [student]  
29

30  
31 In this quote there is both the appreciation of confidential personal details such as "date of birth" but  
32 also the sense that there are areas which are personal and private, such as "politics" and "giving away  
33 too much about myself".  
34  
35

### 36 37 38 **1.2 'Educational tool'**

39  
40 This subtheme describes how, on one hand, social media platforms have significantly enhanced  
41 learning but, on the other hand, must be handled with care. For students, the educational component  
42 is closely linked to the connectedness described in the previous subtheme. Concerns about social  
43 media distracting from learning and in general were evident:  
44  
45  
46

47  
48  
49 *"you can spend hours and hours just scrolling going from Twitter to Facebook to LinkedIn."* [general  
50 practitioner]  
51

52  
53 *"99% of the time it is just for killing time."* [student]  
54

55 Some experts post pictures and scenarios and invite students to suggest differential diagnoses, often  
56 giving the correct answer and an explanation at a later point. While this was appreciated by one  
57 student in the interview, in the follow-up vignette discussion he then questioned the professional  
58 ethics of posting patient information in a publicly accessible forum, and the concepts of consent and  
59  
60

1  
2  
3 confidentiality were raised. When asked about professional concerns relating to the first vignette [on  
4 online sharing of clinical educational material] all participants acknowledged the importance of  
5 confidentiality.  
6  
7

8  
9 *"I think you need to be careful about what you post. Personally, for myself, as a rule of thumb, I don't*  
10 *think you should post anything about clinical... a clinical scenario or anything because that could get*  
11 *you into trouble."* [student]  
12  
13

14 Most noticeable in this last statement is the tension between a very useful medical pedagogical tool,  
15 which may benefit medical students, and the ethicality of referring to patient case studies.  
16  
17  
18

## 21 **2. Online persona**

22  
23 This theme analyses the process whereby learners at all stages of the medical continuum negotiate  
24 an online image and attempt to balance personal and professional dimensions. There are three  
25 subthemes: Crafting an image, societal expectations and boundaries are blurring.  
26  
27  
28

### 29 **2.1 Crafting an image**

30  
31 Participants agreed that care had to be taken with how a medical student/clinician presents  
32 themselves online. Students and GPs were aware that various platforms serve very different  
33 purposes. Both groups indicated a degree of embarrassment with self-promotion on social media. It  
34 appears that all participants were conscious of how they would be perceived by the public. Several  
35 felt it was important to be selective with what gets posted to craft a positive image:  
36  
37  
38

39  
40 *"you can hold an image of yourself... put up the photos where you look good are having a wonderful*  
41 *time.... I suppose also, some people open their hearts a bit too much... it probably doesn't cast them in*  
42 *the best light even if that is not their intention."* [student]  
43  
44

45  
46 Another student explained this concept further, detailing how he restricted what he posted to paint  
47 an almost superhuman version of himself.  
48  
49

50  
51 *"the image you are trying to maintain could be what you identify with or what you want to identify*  
52 *with, but you are not really that, so kind of detachment is potentially harmful particularly with young*  
53 *people.... There is a culture of social media that is centred around vanity and around what you want to*  
54 *identify with versus what you actually identify with."* [student]  
55  
56

57 This quote strongly points to the tensions and pressures in emotional self-regulation involved in  
58 anyone using such impression management strategies. It also highlights the danger, when using social  
59  
60

1  
2  
3 media, of a cognitive dissonance between the image medical students and doctors wish to project and  
4 the extent to which this image accurately reflects who they are.  
5  
6  
7  
8  
9

## 10 **2.2 Societal expectations**

11 This theme considers how they think society might view them when using social media. An  
12 experienced GP participant felt strongly that society expects something more from medical students  
13 compared to other students as they were “future doctors”. This question as to whether society should  
14 expect a higher standard for doctors permeated most of the interviews.  
15  
16  
17  
18

19 *“maybe somebody looking on would say... ‘I don’t care if my plumber has 20 pints at the weekend... or*  
20 *I see them on ‘Facebook’ running... with no clothes on – but I don’t want to see a GP on Monday*  
21 *morning who has been doing that’.” [general practitioner]*  
22  
23  
24

25 The fear of reputation damaged was balanced with the realisation that we cannot all be perfect all the  
26 time. One student described this succinctly but still advised the utmost caution when using social  
27 media:  
28  
29

30 *“We are only human. I mean, God forbid, Watson and Crick who discovered DNA, I am sure they were*  
31 *mad for their lush [alcohol] every once in a while, but who cares?” [student]*  
32  
33  
34

35 Other students took an opposing view and expressed in both interview and follow-up vignette the  
36 need to maintain professional conduct on and off duty.  
37  
38

39 *“They have a reputation to maintain and here they are not representing themselves in a professional*  
40 *manner.” [student]*  
41  
42

43 In some instances, there was dissonance between the view expressed by a participant in the interview  
44 and that of the same participant in the follow-up vignettes. One student, when asked about societal  
45 expectations, cited the example of a picture shared on a social media platform of a doctor smoking a  
46 cigarette, saying that it made no sense for that doctor then to be telling patients not to smoke. When  
47 asked to comment on the vignette where a patient expressed concern about doctors who were  
48 potentially going to operate on her and had appeared drunk on a social media platform, she  
49 responded:  
50  
51  
52  
53

54 *“I would tell her that doctors can’t be doctors all of the time” [student]*  
55  
56  
57  
58  
59

## 60 **2.3 Boundaries are blurring**

1  
2  
3 This subtheme refers to the changing dynamic between doctors and patients to which social media is  
4 contributing. GP participants agreed that it was not unusual to have friends who might be taken on  
5 as patients or to have social interaction in the community with existing patients. However, the  
6 introduction of social media has the potential to destroy privacy and to blur the boundary between  
7 personal and professional.  
8  
9

10  
11  
12 Friend requests on 'Facebook' were cited by many students and GPs as a potential source of  
13 compromise with all viewing it as an inappropriate relationship, fraught with possibilities of doctors'  
14 personal information being inappropriately viewed as well as the potential for medical advice being  
15 requested online. The risk to patient safety brought about by casual contact and giving of advice in a  
16 non-clinical and more relaxed social media environment was pointed out. One GP emphasised  
17 maintaining a division between personal and professional life:  
18  
19  
20  
21

22  
23 *"It is about keeping things separate. Your personal life and your professional life."* [general  
24 practitioner]  
25

26  
27 All of these points, once again, to the need for individual doctors to decide where they are going to draw  
28 their boundary lines with their patients online. This ties into the final theme of what exactly is proper  
29 use of social media by doctors.  
30  
31  
32  
33  
34  
35  
36

### 37 **3 Towards standards and safety**

38  
39 This final theme illustrates the current uncertainty regarding what it means to be a medical  
40 professional on social media. There are two subthemes – clarifying the standard and safe navigation.  
41  
42  
43  
44  
45

#### 46 **3.1 Clarifying the standard**

47  
48 While the data shows that there is awareness among all participants of some ethical dimensions and  
49 legal ramifications of poor conduct on social media, there was no clear consensus on what is  
50 acceptable. One GP, while aware of the limitations of his own experience with social media, expressed  
51 concern for medical students:  
52  
53  
54

55  
56 *"people who have spent all their waking hours for the last ten years stuck in a room swotting, most of*  
57 *them don't have life experience and are not worldly-wise and therefore are very innocent... they are*  
58  
59  
60

1  
2  
3 *just not aware of the huge implications this can have on their future so I think that needs to be spelled*  
4 *out very clearly and explicitly.” [general practitioner]*  
5  
6

7 GPs and students appeared to disagree on whether clinical experiences could be shared online for  
8 teaching and reflective purposes. The vignettes magnified this uncertainty and were useful in  
9 presenting examples of where such social media dilemmas might occur. Most of the GPs believed that  
10 there was insufficient guidance provided for them and for students. They agreed that a clear set of  
11 guidelines was necessary that would uphold good professional conduct while protecting individuals  
12 who, in their leisure time, were trying to unwind:  
13  
14  
15  
16

17  
18 *“It is a stressful enough job. You would hate to think that people would be told that you can never let*  
19 *your hair down, you can never do this or that. I think there has to be a balance somewhere.” [general*  
20 *practitioner]*  
21  
22

23 This quote underlines the imperative of educating future and current physicians in the use of social  
24 media to achieve a private social life.  
25  
26  
27  
28  
29

### 30 **3.2 Safe Navigation**

31  
32 This final subtheme connects the perceptions found throughout the data on how students and GPs  
33 might successfully and safely navigate social media platforms, accessing education and connecting  
34 with others, while at the same time keeping themselves plus their current and future patients safe.  
35 GPs were very clear on what type of information should not be divulged on social media platforms:  
36  
37  
38

39 *“Any info. that you think could harm you, your family or your patients.” [ general practitioner]*  
40  
41

42 The follow-up vignettes revealed that for three of the students, there was a high level of awareness  
43 of risks with sharing information on SMPs. They recognised the potential for litigation and damaged  
44 career opportunities as consequences of inappropriate use of SMPs. However, a fourth student, did  
45 not appear to have this level of awareness and was actively engaging in broadcasting her own clinical  
46 experiences on SMPs seemingly without awareness of the dangers:  
47  
48  
49

50  
51 *“I have a [You Tube] channel that I just started, and I am just uploading some videos about my life...*  
52 *about medicine”*  
53

54  
55 *[Interviewer] Do you think there are any risks with that?*  
56

57 *“no, not really.” [student]*  
58  
59  
60

1  
2  
3 There was no evidence among participants of any level of participation in formal education on  
4 engaging social media, and for most, awareness seemed to come from life experience. One student  
5 told how lessons learned about life as a younger girl influenced her behaviour on SMPs:  
6  
7

8  
9 *“My dad used to always give us lectures about pictures which I totally understand so I do have certain*  
10 *settings on ‘Facebook’ which only allows... not even all my friends to see my photos” [student]*  
11

12  
13 There was a notable lack of awareness of the existence of guidelines among both groups of  
14 participants. All agreed that, in general, social media is a positive thing, but most urged caution and  
15 showed awareness of risk.  
16

17  
18 *“I think overall, social media is great but just be careful with it. That is the long and the short of it.”*  
19 *[general practitioner]*  
20  
21

## 22 23 24 25 **Discussion**

26  
27  
28  
29  
30 The analysis has provided new insights into the research question in terms of investigating the  
31 understanding and attitudes of GPs and medical students to use of and behaviour on social media.  
32 While all were agreed that it provides useful educational and networking benefits to the profession,  
33 most expressed unease about boundary setting and staying safe on these platforms. GPs and medical  
34 students appeared to agree that there was a line between professional and personal realms that  
35 needed to be maintained, but for medical students in particular, defining where that boundary lies  
36 was difficult to conclude. The students interviewed had all completed an 18-week placement in  
37 general practice and it is possible that this placement influenced student attitudes and research has  
38 reported that medical students’ professionalism increases with more clinical exposure [30].  
39 Participants’ awareness of the potential effects of social media mishaps on their future career appears  
40 to be well founded, with reports of post graduate training directors checking prospective candidates’  
41 social media profiles prior to interview [31]. Evidence suggests that patients’ perceptions of their  
42 physician’s professionalism can be influenced by the content of their social media accounts [32, 33].  
43  
44  
45  
46  
47  
48  
49  
50  
51

52  
53 The scenario that caused the most disagreement among participants related to a video of doctors  
54 behaving unprofessionally during their time off, with some defending them and others saying it was  
55 unacceptable to behave in a certain way at any time. The statement in our study that “doctors can’t  
56 be doctors all of the time” is similar to a previously reported finding [34]. An important point in our  
57 study is the discordance within participants between what they think and what they say, as illustrated  
58  
59  
60

1  
2  
3 by the follow up interview seeking their reactions to scenarios, and similar findings have been reported  
4 [35]. Establishing boundaries in a social media age is difficult for all citizens but especially for doctors  
5 as they expected to practise to the highest level. The quote regarding Crick and Watson was very  
6 apposite in this respect.  
7  
8  
9

10 The theme of 'crafting an image' refers to the efforts of medical students and physicians to portray  
11 themselves favourably on social media. This phenomenon has been described as an online "identity  
12 crisis" for medical professionals [36]. Researchers have warned of the problem of conflating "self-  
13 expression, self-promotion and self-communication" [37]. While concepts such as wellness and  
14 efficiency are described in medical literature [38], the concern regarding projecting an unrealistic  
15 image in a world where privacy is difficult to control, which was raised by participants in this study,  
16 has not been addressed previously. Research has reported that taking time away from social media  
17 can decrease stress levels [39]. Such a finding may in part be related to the pressure described in our  
18 study of maintaining an 'online persona'.  
19  
20  
21  
22  
23  
24  
25

26 The concept of dual relationships, whereby professionals and the public interact formally at times and  
27 informally at other times is brought to a greater level of acuity by social media where 'context  
28 collapses'- a point emphasised in our data [40]. Formal education at medical school in digital  
29 professional identity formation in medical school curricula is thus important as is subsequent  
30 professional accreditation [41]. Interventions aimed at promoting professionalism on social media  
31 are acceptable to students [42] and most students made and maintained positive changes to their  
32 social media use [43]. Some of the participants in our study were aware of which social media  
33 platforms to use for various purposes and how to use privacy settings to ensure safety. Education on  
34 how to apply this knowledge has been successful in medical schools elsewhere [44]. Several of the  
35 study participants called for medical council guidance on social media use but this in fact is already  
36 available and reflects research findings in Britain pointing to the need to publicise these guidelines  
37 effectively [45, 46]. This may indicate the need for regular communication between accreditation  
38 bodies and both students and doctors as social media platforms change so rapidly.  
39  
40  
41  
42  
43  
44  
45  
46  
47  
48  
49  
50

### 51 **Strengths and weaknesses**

52 The "two stage" nature of the study, involving in depth interviews followed up by a phone call soliciting  
53 views on hypothetical scenarios, was a particular strength as it allowed participants to reflect on their  
54 views. A useful cross-cultural element was the participation of GPs and medical students from Ireland  
55 and North America. A weakness of the study was its location in a single medical school in Ireland.  
56  
57  
58  
59  
60

### **Implications for further research and practice**

Research is warranted to identify how best to teach safe practices for engaging with social media. It is also clear that medical school curricula must address how students need to use social media professionally and ethically from the earliest stages of their career. This should involve clear and dynamic guidelines for medical students and GPs to understand and implement ethical social media use in the medical profession due to the rapidly changing speed and scope of social media.

### **Conclusion**

Students and GPs alike view social media as a positive resource for the medical profession. Guidance is required for students and medical practitioners on how to establish reasonable boundaries between their personal and professional presence on social media and in their right to a private life in which ineffective use of social media does not negatively affect career prospects.

### **Acknowledgements**

The authors are grateful to the students who inspired and contributed to the study as well as the GP tutors on the School of Medicine's ULEARN-GP network.

### **Contributors**

MM (MB BCh BAO) was involved in the study design, data collection and analysis and helped to write the first draft; VN (PhD) was involved in the data analysis and write up, ES (PhD) was involved in study design, oversight, analysis and write-up; JMD (PhD) was involved in the data analysis and write up; ROC (MB BCh BAO, MMedSc) was involved in data analysis, write-up; JOD (MA) was involved in study design, data analysis and write-up; AOR (MB BCh BAO, MMedSc) was involved in all stages of the project. Each author contributed to all drafts of the paper, and read and approved the final manuscript.

### **Competing interests**

We have read and understood BMJ policy on declaration of interests and declare that we have no competing interests.



1  
2  
3 **Ethics approval** University of Limerick Department of Education and Health Sciences Research  
4  
5 Ethics Committee; 2017\_05\_17\_EHS  
6

7 **Provenance and peer review** Not commissioned; externally peer reviewed.  
8

9 **Data sharing statement** No additional data are available.  
10  
11  
12  
13  
14  
15  
16  
17  
18

## 19 **References**

- 20  
21  
22  
23  
24 1. Borgmann H, Cooperberg M, Murphy D, Loeb S, N'Dow J, Ribal MJ, et al. Online  
25 professionalism—2018 update of European Association of Urology[@ Uroweb] recommendations on  
26 the appropriate use of social media. *European urology*. 2018;74[5]:644-50.  
27  
28 2. Farnan JM, Snyder Sulmasy L, Worster BK, Chaudhry HJ, Rhyne JA, Arora VM. Online medical  
29 professionalism: patient and public relationships: policy statement from the American College of  
30 Physicians and the Federation of State Medical Boards. *Annals of internal medicine*. 2013; 158[8]:620-  
31 7.  
32  
33 3. Treem JW, Dailey SL, Pierce CS, Biffi D. What we are talking about when we talk about social  
34 media: A framework for study. *Sociology Compass*. 2016;10[9]:768-84.  
35  
36 4. McNeill A, Harris PR, Briggs P. Twitter influence on UK vaccination and antiviral uptake during  
37 the 2009 H1N1 pandemic. *Frontiers in public health*. 2016;4:26.  
38  
39 5. Patel R, Chang T, Greysen SR, Chopra V. Social media use in chronic disease: a systematic  
40 review and novel taxonomy. *The American journal of medicine*. 2015;128[12]:1335-50.  
41  
42 6. Ahani A, Nilashi M. Coronavirus outbreak and its impacts on global economy: the role of social  
43 network sites. *Journal of Soft Computing and Decision Support Systems*. 2020;7[2]:19-22.  
44  
45 7. Smailhodzic E, Hooijsma W, Boonstra A, Langley DJ. Social media use in healthcare: a  
46 systematic review of effects on patients and on their relationship with healthcare professionals. *BMC*  
47 *health services research*. 2016;16[1]:442.  
48  
49 8. Giustini D, Ali SM, Fraser M, Boulos MNK. Effective uses of social media in public health and  
50 medicine: a systematic review of systematic reviews. *Online Journal of Public Health Informatics*.  
51 2018;10[2].  
52  
53  
54  
55  
56  
57  
58  
59  
60

- 1  
2  
3 9. Kind T. Professional guidelines for social media use: a starting point. *AMA journal of ethics*.  
4 2015;17[5]:441-7.  
5
- 6 10. Chauhan B, George R, Coffin J. Social media and you: what every physician needs to know. *J*  
7 *Med Pract Manage*. 2012;28[3]:206-9.  
8
- 9 11. O'Sullivan E, Cutts E, Kavikondala S, Salcedo A, D'Souza K, Hernandez-Torre M, et al. Social  
10 media in health science education: an international survey. *JMIR Medical Education*. 2017;3[1]:e1.  
11
- 12 12. Barlow CJ, Morrison S, Stephens HO, Jenkins E, Bailey MJ, Pilcher D. Unprofessional behaviour  
13 on social media by medical students. *Medical Journal of Australia*. 2015;203[11]:439-  
14
- 15 13. Garner J, O'Sullivan H. Facebook and the professional behaviours of undergraduate medical  
16 students. *The clinical teacher*. 2010;7[2]:112-5.  
17
- 18 14. Kitsis EA, Milan FB, Cohen HW, Myers D, Herron P, McEvoy M, et al. Who's misbehaving?  
19 Perceptions of unprofessional social media use by medical students and faculty. *BMC medical*  
20 *education*. 2016;16[1]:1-7.  
21
- 22 15. Mak-Van Der Vossen, M., Van Mook, W., Van Der Burgt, S., Kors, J., Ket, J. C., Croiset, G., &  
23 Kusrkar, R. Descriptors for unprofessional behaviours of medical students: a systematic review and  
24 categorisation. *BMC medical education*. 2017; 17[1], 164.  
25
- 26 16. Gholami-Kordkheili F, Wild V, Strech D. The impact of social media on medical professionalism:  
27 a systematic qualitative review of challenges and opportunities. *Journal of medical Internet research*.  
28 2013;15[8]:e184.  
29
- 30 17. O'Regan A, Smithson WH, Spain E. Social media and professional identity: pitfalls and  
31 potential. *Medical teacher*. 2018;40[2]:112-6.  
32
- 33 18. Campbell L, Evans Y, Pumper M, Moreno MA. Social media use by physicians: a qualitative  
34 study of the new frontier of medicine. *BMC medical informatics and decision making*. 2016;16[1]:91.  
35
- 36 19. Chretien KC, Goldman EF, Beckman L, Kind T. It's your own risk: medical students' perspectives  
37 on online professionalism. *Academic Medicine*. 2010;85[10]:S68-S71.  
38
- 39 20. Tong A, Sainsbury P, Craig J. Consolidated criteria for reporting qualitative research[*COREQ*]:  
40 a 32-item checklist for interviews and focus groups. *International journal for quality in health care*.  
41 2007;19[6]:349-57.  
42
- 43 21. Wilson J, While AE. Methodological issues surrounding the use of vignettes in qualitative  
44 research. *Journal of Interprofessional Care*. 1998;12[1]:79-86.  
45
- 46 22. Wilks T. The use of vignettes in qualitative research into social work values. *Qualitative social*  
47 *work*. 2004;3[1]:78-87.  
48
- 49 23. O'Regan A, Hayes P, O'Connor R, Casey M, O'Dwyer P, Culhane A, et al. The University of  
50 Limerick Education and Research Network for General Practice[*ULEARN-GP*]: practice characteristics  
51 and general practitioner perspectives. *BMC family practice*. 2020;21[1]:1-11.  
52  
53  
54  
55  
56  
57  
58  
59  
60

- 1  
2  
3 24. Francis JJ, Johnston M, Robertson C, Glidewell L, Entwistle V, Eccles MP, et al. What is an  
4 adequate sample size? Operationalising data saturation for theory-based interview studies.  
5 Psychology and health. 2010;25[10]:1229-45.  
6  
7  
8 25. Rashid-Doubell F, Mohamed S, Elmusharaf K, O'Neill C. A balancing act: a phenomenological  
9 exploration of medical students' experiences of using mobile devices in the clinical setting. BMJ open.  
10 2016;6[5].  
11  
12  
13 26. Brooks J, McCluskey S, Turley E, King N. The utility of template analysis in qualitative  
14 psychology research. Qualitative research in psychology. 2015;12[2]:202-22.  
15  
16  
17 27. King N. 21—Using Templates in the Thematic Analysis ofText—. Essential guide to  
18 qualitative methods in organizational research. 2004:256.  
19  
20 28. Brooks J, King N. Doing template analysis: evaluating an end of life care service. Sage research  
21 methods cases. 2014.  
22  
23 29. Berger R. Now I see it, now I don't: Researcher's position and reflexivity in qualitative research.  
24 Qualitative research. 2015;15[2]:219-34.  
25  
26 30. Zulkifli J, Noel B, Bennett D, O'Flynn S, O'Tuathaigh C. Medical students' perceptions of  
27 professional misconduct: relationship with typology and year of programme. Journal of medical ethics.  
28 2018;44[2]:133-7.  
29  
30  
31 31. Hanzel T, Richards J, Schwitters P, Smith K, Wendland K, Martin J, et al. # DocsOnTwitter: how  
32 physicians use social media to build social capital. Hospital topics. 2018;96[1]:9-17.  
33  
34 32. Maben-Feaster RE, Stansfield RB, Opiari A, Hammoud MM. Evaluating patient perspectives  
35 of provider professionalism on Twitter in an academic obstetrics and gynecology clinic: Patient survey.  
36 Journal of medical Internet research. 2018;20[3]:e78.  
37  
38 33. Fatollahi JJ, Colbert JA, Agarwal P, Lee JL, Lehmann EY, Yuan N, et al. The impact of physician  
39 social media behavior on patient trust. AJOB Empirical Bioethics. 2020;11[2]:77-82.  
40  
41 34. Ross S, Lai K, Walton JM, Kirwan P, White JS. "I have the right to a private life": Medical  
42 students' views about professionalism in a digital world. Medical teacher. 2013;35[10]:826-31.  
43  
44 35. Rocha PN, de Castro NAA. Opinions of students from a Brazilian medical school regarding  
45 online professionalism. Journal of general internal medicine. 2014;29[5]:758-64.  
46  
47 36. DeCamp M, Koenig TW, Chisolm MS. Social media and physicians' online identity crisis. Jama.  
48 2013;310[6]:581-2.  
49  
50 37. Van Dijck J. 'You have one identity': performing the self on Facebook and LinkedIn. Media,  
51 culture & society. 2013;35[2]:199-215.  
52  
53  
54  
55  
56  
57  
58  
59  
60

- 1  
2  
3 38. Bohman B, Dyrbye L, Sinsky CA, Linzer M, Olson K, Babbott S, et al. Physician well-being: the  
4 reciprocity of practice efficiency, culture of wellness, and personal resilience. *NEJM Catalyst*.  
5 2017;3[4].  
6  
7  
8 39. Turel O, Cavagnaro DR, Meshi D. Short abstinence from online social networking sites reduces  
9 perceived stress, especially in excessive users. *Psychiatry research*. 2018;270:947-53.  
10  
11 40. Sugimoto C, Hank C, Bowman T, Pomerantz J. Friend or faculty: Social networking sites, dual  
12 relationships, and context collapse in higher education. *First Monday*. 2015.  
13  
14 41. Jawed S, Mahboob U, Yasmeen R. Digital professional identity: Dear Internet! Who am I?  
15 *Education for Health*. 2019;32[1]:33.  
16  
17 42. Bramstedt KA, Ierna BN, Woodcroft-Brown VK. Using SurveyMonkey® to teach safe social  
18 media strategies to medical students in their clinical years. *Communication & medicine*.  
19 2014;11[2]:117.  
20  
21 43. Gomes AW, Butera G, Chretien KC, Kind T. The development and impact of a social media and  
22 professionalism course for medical students. *Teaching and learning in medicine*. 2017;29[3]:296-303.  
23  
24 44. Walton JM, White J, Ross S. What's on YOUR Facebook profile? Evaluation of an educational  
25 intervention to promote appropriate use of privacy settings by medical students on social networking  
26 sites. *Medical education online*. 2015;20[1]:28708.  
27  
28 45. Osman A, Wardle A, Caesar R. Online professionalism and Facebook—falling through the  
29 generation gap. *Medical teacher*. 2012;34[8]:e549-e56.  
30  
31 46. Kang J, Djafari Marbini H, Patel P, Fawcett N, Leaver L. Survey of medical students' use of social  
32 media. *The clinical teacher*. 2015;12[6]:373-7.  
33  
34  
35  
36  
37  
38  
39  
40  
41  
42  
43  
44  
45  
46  
47  
48  
49  
50  
51  
52  
53  
54  
55  
56  
57  
58  
59  
60

*Table 1: Participant Characteristics*

| GPs/ final year Medical Student | Gender[M/F] | Age Category[20-30],[30-40],[40+] | Style of Interview[face to face, phone, Skype] |
|---------------------------------|-------------|-----------------------------------|------------------------------------------------|
| Interview 1: GP                 | F           | 30-40                             | Phone                                          |
| Interview 2: GP                 | M           | 30-40                             | Phone                                          |
| Interview 3: Medical Student    | M           | 20-30                             | Skype                                          |
| Interview 4: Medical Student    | M           | 20-30                             | Face-to-face                                   |
| Interview 5: Medical Student    | M           | 20-30                             | Face-to-face                                   |
| Interview 6: Medical student    | F           | 30-40                             | Face-to-face                                   |
| Interview 7: GP                 | M           | 40+                               | Face-to-face                                   |
| Interview 8: Medical student    | F           | 20-30                             | Fact-to-face                                   |

## COREQ (CONsolidated criteria for REporting Qualitative research) Checklist

A checklist of items that should be included in reports of qualitative research. You must report the page number in your manuscript where you consider each of the items listed in this checklist. If you have not included this information, either revise your manuscript accordingly before submitting or note N/A.

| Topic                                          | Item No. | Guide Questions/Description                                                                                                                              | Reported on Page No. |
|------------------------------------------------|----------|----------------------------------------------------------------------------------------------------------------------------------------------------------|----------------------|
| <b>Domain 1: Research team and reflexivity</b> |          |                                                                                                                                                          |                      |
| <i>Personal characteristics</i>                |          |                                                                                                                                                          |                      |
| Interviewer/facilitator                        | 1        | Which author/s conducted the interview or focus group?                                                                                                   |                      |
| Credentials                                    | 2        | What were the researcher's credentials? E.g. PhD, MD                                                                                                     |                      |
| Occupation                                     | 3        | What was their occupation at the time of the study?                                                                                                      |                      |
| Gender                                         | 4        | Was the researcher male or female?                                                                                                                       |                      |
| Experience and training                        | 5        | What experience or training did the researcher have?                                                                                                     |                      |
| <i>Relationship with participants</i>          |          |                                                                                                                                                          |                      |
| Relationship established                       | 6        | Was a relationship established prior to study commencement?                                                                                              |                      |
| Participant knowledge of the interviewer       | 7        | What did the participants know about the researcher? e.g. personal goals, reasons for doing the research                                                 |                      |
| Interviewer characteristics                    | 8        | What characteristics were reported about the interviewer/facilitator? e.g. Bias, assumptions, reasons and interests in the research topic                |                      |
| <b>Domain 2: Study design</b>                  |          |                                                                                                                                                          |                      |
| <i>Theoretical framework</i>                   |          |                                                                                                                                                          |                      |
| Methodological orientation and Theory          | 9        | What methodological orientation was stated to underpin the study? e.g. grounded theory, discourse analysis, ethnography, phenomenology, content analysis |                      |
| <i>Participant selection</i>                   |          |                                                                                                                                                          |                      |
| Sampling                                       | 10       | How were participants selected? e.g. purposive, convenience, consecutive, snowball                                                                       |                      |
| Method of approach                             | 11       | How were participants approached? e.g. face-to-face, telephone, mail, email                                                                              |                      |
| Sample size                                    | 12       | How many participants were in the study?                                                                                                                 |                      |
| Non-participation                              | 13       | How many people refused to participate or dropped out? Reasons?                                                                                          |                      |
| <i>Setting</i>                                 |          |                                                                                                                                                          |                      |
| Setting of data collection                     | 14       | Where was the data collected? e.g. home, clinic, workplace                                                                                               |                      |
| Presence of non-participants                   | 15       | Was anyone else present besides the participants and researchers?                                                                                        |                      |
| Description of sample                          | 16       | What are the important characteristics of the sample? e.g. demographic data, date                                                                        |                      |
| <i>Data collection</i>                         |          |                                                                                                                                                          |                      |
| Interview guide                                | 17       | Were questions, prompts, guides provided by the authors? Was it pilot tested?                                                                            |                      |
| Repeat interviews                              | 18       | Were repeat interviews carried out? If yes, how many?                                                                                                    |                      |
| Audio/visual recording                         | 19       | Did the research use audio or visual recording to collect the data?                                                                                      |                      |
| Field notes                                    | 20       | Were field notes made during and/or after the interview or focus group?                                                                                  |                      |
| Duration                                       | 21       | What was the duration of the interviews or focus group?                                                                                                  |                      |
| Data saturation                                | 22       | Was data saturation discussed?                                                                                                                           |                      |
| Transcripts returned                           | 23       | Were transcripts returned to participants for comment and/or                                                                                             |                      |

| Topic                                  | Item No. | Guide Questions/Description                                                                                                        | Reported on Page No. |
|----------------------------------------|----------|------------------------------------------------------------------------------------------------------------------------------------|----------------------|
|                                        |          | correction?                                                                                                                        |                      |
| <b>Domain 3: analysis and findings</b> |          |                                                                                                                                    |                      |
| <i>Data analysis</i>                   |          |                                                                                                                                    |                      |
| Number of data coders                  | 24       | How many data coders coded the data?                                                                                               |                      |
| Description of the coding tree         | 25       | Did authors provide a description of the coding tree?                                                                              |                      |
| Derivation of themes                   | 26       | Were themes identified in advance or derived from the data?                                                                        |                      |
| Software                               | 27       | What software, if applicable, was used to manage the data?                                                                         |                      |
| Participant checking                   | 28       | Did participants provide feedback on the findings?                                                                                 |                      |
| <i>Reporting</i>                       |          |                                                                                                                                    |                      |
| Quotations presented                   | 29       | Were participant quotations presented to illustrate the themes/findings?<br>Was each quotation identified? e.g. participant number |                      |
| Data and findings consistent           | 30       | Was there consistency between the data presented and the findings?                                                                 |                      |
| Clarity of major themes                | 31       | Were major themes clearly presented in the findings?                                                                               |                      |
| Clarity of minor themes                | 32       | Is there a description of diverse cases or discussion of minor themes?                                                             |                      |

Developed from: Tong A, Sainsbury P, Craig J. Consolidated criteria for reporting qualitative research (COREQ): a 32-item checklist for interviews and focus groups. *International Journal for Quality in Health Care*. 2007. Volume 19, Number 6: pp. 349 – 357

**Once you have completed this checklist, please save a copy and upload it as part of your submission. DO NOT include this checklist as part of the main manuscript document. It must be uploaded as a separate file.**

1  
2  
3 *Interview Guide*  
4  
5

|                                                                                                                                          |
|------------------------------------------------------------------------------------------------------------------------------------------|
| 6 Interview Guide                                                                                                                        |
| 7                                                                                                                                        |
| 8 1. Tell me about your experience of social media.                                                                                      |
| 9                                                                                                                                        |
| 10 2. Do you share personal information online such as pictures, location and<br>11 employment status? If yes/no, why?                   |
| 12                                                                                                                                       |
| 13 3. Do you use social media for personal or professional use?                                                                          |
| 14                                                                                                                                       |
| 15 4. What do you feel are the benefits of using social media apps?                                                                      |
| 16                                                                                                                                       |
| 17 5. What do you feel are the risks associated with the use of social media?                                                            |
| 18                                                                                                                                       |
| 19 6. As a clinician/ future clinician how would you feel about patients contacting<br>20 you/following you on social media?<br>21<br>22 |

23  
24  
25  
26  
27 *Vignettes*  
28  
29

|                                                                                                                                                                                                                                                                                                                                                                                                                                                                                                                                                                                                                                                                            |
|----------------------------------------------------------------------------------------------------------------------------------------------------------------------------------------------------------------------------------------------------------------------------------------------------------------------------------------------------------------------------------------------------------------------------------------------------------------------------------------------------------------------------------------------------------------------------------------------------------------------------------------------------------------------------|
| 30 Follow up interviews: Vignettes                                                                                                                                                                                                                                                                                                                                                                                                                                                                                                                                                                                                                                         |
| 31                                                                                                                                                                                                                                                                                                                                                                                                                                                                                                                                                                                                                                                                         |
| 32                                                                                                                                                                                                                                                                                                                                                                                                                                                                                                                                                                                                                                                                         |
| 33 1. “Michelle Kelly is a student nurse. She recently posted a photo to twitter showing<br>34 the Accident and Emergency room of the hospital in which she is training on a<br>35 Saturday night. The caption for the photograph was “The crazies are really out<br>36 tonight...”. There were several patients in the photograph, although only one is<br>37 readily identifiable. You see from her feed that she is “friends” with a number of<br>38 former patients on facebook. In a series of posts with one former patient, John, they<br>39 discuss the upsetting nature of the injuries received by an unidentified patient, with<br>40 whom John shared a room”. |
| 41                                                                                                                                                                                                                                                                                                                                                                                                                                                                                                                                                                                                                                                                         |
| 42                                                                                                                                                                                                                                                                                                                                                                                                                                                                                                                                                                                                                                                                         |
| 43                                                                                                                                                                                                                                                                                                                                                                                                                                                                                                                                                                                                                                                                         |
| 44                                                                                                                                                                                                                                                                                                                                                                                                                                                                                                                                                                                                                                                                         |
| 45                                                                                                                                                                                                                                                                                                                                                                                                                                                                                                                                                                                                                                                                         |
| 46                                                                                                                                                                                                                                                                                                                                                                                                                                                                                                                                                                                                                                                                         |
| 47                                                                                                                                                                                                                                                                                                                                                                                                                                                                                                                                                                                                                                                                         |
| 48                                                                                                                                                                                                                                                                                                                                                                                                                                                                                                                                                                                                                                                                         |
| 49                                                                                                                                                                                                                                                                                                                                                                                                                                                                                                                                                                                                                                                                         |
| 50                                                                                                                                                                                                                                                                                                                                                                                                                                                                                                                                                                                                                                                                         |
| 51                                                                                                                                                                                                                                                                                                                                                                                                                                                                                                                                                                                                                                                                         |
| 52                                                                                                                                                                                                                                                                                                                                                                                                                                                                                                                                                                                                                                                                         |
| 53                                                                                                                                                                                                                                                                                                                                                                                                                                                                                                                                                                                                                                                                         |
| 54                                                                                                                                                                                                                                                                                                                                                                                                                                                                                                                                                                                                                                                                         |
| 55 2. “As a senior house officer in a busy surgical outpatients clinic, you consult with a<br>56 young lady who is on the laparoscopy waiting list. She appears disconcerted and<br>57 tells you about a recent you tube video link that was shared with her by a friend.<br>58<br>59<br>60                                                                                                                                                                                                                                                                                                                                                                                |



1  
2  
3  
4  
5  
6  
7  
8  
9  
10  
11  
12  
13  
14  
15  
16  
17  
18  
19  
20  
21  
22  
23  
24  
25  
26  
27  
28  
29  
30  
31  
32  
33  
34  
35  
36  
37  
38  
39  
40  
41  
42  
43  
44  
45  
46  
47  
48  
49  
50  
51  
52  
53  
54  
55  
56  
57  
58  
59  
60

The video involved a group of young men who appeared drunk and were taking turns jumping into a swimming pool after drinking a pint of alcohol. She recognised one of them as the surgical registrar who booked her for her upcoming laparoscopy. She has since found out that the others were also junior doctors in the hospital. She tells you that, although she has no problem with clinicians enjoying themselves, she would not be comfortable with such unprofessional type people having such involvement in her health”.

- How would you approach this problem with the patient?
- What ethical and professional issues arise here?

3. “While on placement in final year of physiotherapy, a friend sends you a screen shot of a blog that one of your classmates is running. The classmate is a very hard working student and has always shared resources with you. The blog is a day by day account of your classmate’s clinical encounters, highlighting learning points and tips for the final year examination. The screenshot is of a paragraph outlining in detail the history of a road traffic accident that led to a client presenting to her. The client’s name is not given but the gender, age, locality and date of accident is documented. The screenshot is followed by this comment from your friend: “no prizes for guessing who this guy is!”

- Would you act on this information? If so, how?
- What ethical and legal dilemmas arise while sharing experiences online?

# BMJ Open

**“Doctors can’t be doctors all of the time”: a qualitative study of how general practitioners and medical students negotiate public- professional and private-personal realms using social media**

|                                 |                                                                                                                                                                                                                                                                                                                                                                                                                                                                                                                                                                                                                                                                                                                                                         |
|---------------------------------|---------------------------------------------------------------------------------------------------------------------------------------------------------------------------------------------------------------------------------------------------------------------------------------------------------------------------------------------------------------------------------------------------------------------------------------------------------------------------------------------------------------------------------------------------------------------------------------------------------------------------------------------------------------------------------------------------------------------------------------------------------|
| Journal:                        | <i>BMJ Open</i>                                                                                                                                                                                                                                                                                                                                                                                                                                                                                                                                                                                                                                                                                                                                         |
| Manuscript ID                   | bmjopen-2020-047991.R1                                                                                                                                                                                                                                                                                                                                                                                                                                                                                                                                                                                                                                                                                                                                  |
| Article Type:                   | Original research                                                                                                                                                                                                                                                                                                                                                                                                                                                                                                                                                                                                                                                                                                                                       |
| Date Submitted by the Author:   | 08-Sep-2021                                                                                                                                                                                                                                                                                                                                                                                                                                                                                                                                                                                                                                                                                                                                             |
| Complete List of Authors:       | <p>Marshal, Megan; Health Research Institute, University of Limerick School of Medicine<br/> Niranjan, Vikram; Health Research Institute, University of Limerick School of Medicine<br/> Spain, Eimear; Health Research Institute, University of Limerick School of Medicine<br/> MacDonagh, Joe; Technical University Dublin, School of Business and Humanities<br/> O'Doherty, Jane; Health Research Institute, University of Limerick School of Medicine<br/> O'Connor, Raymond; Health Research Institute, University of Limerick School of Medicine, Graduate Entry Medical School<br/> O'Regan, Andrew; University of Limerick Faculty of Education and Health Sciences, Health Research Institute, University of Limerick School of Medicine</p> |
| <b>Primary Subject Heading</b>: | Medical education and training                                                                                                                                                                                                                                                                                                                                                                                                                                                                                                                                                                                                                                                                                                                          |
| Secondary Subject Heading:      | Ethics                                                                                                                                                                                                                                                                                                                                                                                                                                                                                                                                                                                                                                                                                                                                                  |
| Keywords:                       | PRIMARY CARE, MEDICAL EDUCATION & TRAINING, MEDICAL ETHICS                                                                                                                                                                                                                                                                                                                                                                                                                                                                                                                                                                                                                                                                                              |
|                                 |                                                                                                                                                                                                                                                                                                                                                                                                                                                                                                                                                                                                                                                                                                                                                         |

SCHOLARONE™  
Manuscripts



I, the Submitting Author has the right to grant and does grant on behalf of all authors of the Work (as defined in the below author licence), an exclusive licence and/or a non-exclusive licence for contributions from authors who are: i) UK Crown employees; ii) where BMJ has agreed a CC-BY licence shall apply, and/or iii) in accordance with the terms applicable for US Federal Government officers or employees acting as part of their official duties; on a worldwide, perpetual, irrevocable, royalty-free basis to BMJ Publishing Group Ltd ("BMJ") its licensees and where the relevant Journal is co-owned by BMJ to the co-owners of the Journal, to publish the Work in this journal and any other BMJ products and to exploit all rights, as set out in our [licence](#).

The Submitting Author accepts and understands that any supply made under these terms is made by BMJ to the Submitting Author unless you are acting as an employee on behalf of your employer or a postgraduate student of an affiliated institution which is paying any applicable article publishing charge ("APC") for Open Access articles. Where the Submitting Author wishes to make the Work available on an Open Access basis (and intends to pay the relevant APC), the terms of reuse of such Open Access shall be governed by a Creative Commons licence – details of these licences and which [Creative Commons](#) licence will apply to this Work are set out in our licence referred to above.

Other than as permitted in any relevant BMJ Author's Self Archiving Policies, I confirm this Work has not been accepted for publication elsewhere, is not being considered for publication elsewhere and does not duplicate material already published. I confirm all authors consent to publication of this Work and authorise the granting of this licence.

1  
2  
3 **Title page**  
4  
5  
6  
7  
8

9 **“Doctors can’t be doctors all of the time”: a qualitative study of how general practitioners and**  
10 **medical students negotiate public- professional and private-personal realms using social media**  
11  
12

13  
14 M Marshal<sup>1</sup>, V Niranjana<sup>2</sup>, E Spain<sup>1</sup>, J MacDonagh<sup>3</sup>, J O’Doherty<sup>1</sup>, R O’Connor<sup>1</sup>, \*A O’Regan<sup>1</sup>  
15  
16

17  
18  
19  
20 \*corresponding author Dr Andrew O’Regan, address: School of Medicine, University of Limerick, Limerick, Ireland; email- [andrew.oregan@ul.ie](mailto:andrew.oregan@ul.ie)  
21

22  
23 <sup>1</sup> Health Research Institute University of Limerick School of Medicine, Limerick, Ireland  
24

25  
26 <sup>2</sup>School of Public Health Physiotherapy and Sports Science, University College Dublin, Dublin, Ireland  
27

28  
29 <sup>3</sup> School of Business & Humanities, Technological University Dublin, Ireland  
30  
31

32  
33  
34 Key words – General Practice, Social media, online professionalism, medical education  
35  
36

37 Manuscript word count – 4923  
38  
39  
40  
41

42 **Abstract**  
43  
44

45 **Objective-** The objective of this study is to explore the experiences and perspectives of general  
46 practitioners’ and medical students’ use of, and behaviour on, social media and to understand how  
47 they negotiate threats to professional and personal life on social media.  
48  
49

50  
51  
52 **Design-** A two phase qualitative design was employed, consisting of semi-structured interviews and  
53 follow-up vignettes, where participants were asked to respond to vignettes that involved varying  
54 degrees of unprofessional behaviour. Data were analysed using template analysis.  
55  
56  
57  
58  
59  
60

1  
2  
3 **Setting and Participants-** Participants were general practitioner tutors and third year medical students  
4 who had just completed placement on the University of Limerick longitudinal integrated clerkship.  
5  
6  
7 Five students and three general practitioners affiliated with the medical school were invited to  
8  
9 participate in one-to-one interviews.  
10

11  
12 **Results** – three overarching themes, each containing subthemes were reported. ‘Staying in contact  
13 and up to date’ outlines how social media platforms provide useful resources and illustrates the  
14 potential risks of social media. ‘Online persona’ considers how social media have contributed to  
15 changing the nature of inter-personal relationships. ‘Towards standards and safety’ raises the matter  
16 of how to protect patients, doctors and the medical profession.  
17  
18  
19  
20  
21  
22

23  
24 **Conclusion** - Guidance is required for students and medical practitioners on how to establish  
25 reasonable boundaries between their personal and professional presence on social media and in their  
26 private life so that poorly judged use of social media does not negatively affect career prospects and  
27 professional efficacy.  
28  
29  
30  
31  
32  
33  
34  
35  
36  
37  
38  
39

#### 40 **Strengths and Weaknesses of the Study**

- 41
- 42
- 43 • The sampling method facilitated balance of gender, age and nationality of participants.
- 44
- 45
- 46 • The conceptual lens, communities of learning, situated the data in terms of accepted theory  
47 and evidence.
- 48
- 49
- 50
- 51 • The use of vignettes provided rich data on participants’ experience of social media use and  
52 behaviour.
- 53
- 54
- 55
- 56 • The study was limited to one cohort of participants in a single medical school.
- 57
- 58
- 59 • The number of participants was relatively small (N=8).
- 60

## Introduction

Social media is defined as “a group of internet-based applications that build on the ideological and technological foundations of Web 2.0, and that allow the creation and exchange of user generated content” [1]. It has become an effective communication tool for public health to convey information to populations in ‘real-time’ during the COVID-19 pandemic [2]. While social media can improve communication in some instances, the associated environment is fraught with the danger of suboptimal communication [3]. A comprehensive review warned that, for health professionals and patients, social media can negatively impact on mental health, privacy and information quality [4]. The concept of ‘online professionalism’, rooted in the traditional values of medicine, has evolved in the past decade in response to the challenges of the constantly changing social media sphere [5].

Unprofessional online behaviour resulting in disciplinary action for medical students and doctors is concerning [6]; one international study reported that almost one fifth of the medical students surveyed admitted to sharing clinical images inappropriately [7]. Similarly, surveys of medical students in Australia [8], England [9] and the USA [10] reported that unprofessional social media posting was common. While regulatory guidelines are available, inappropriate behaviour on social media remains problematic [11], with the majority of residents in one study admitting to having posted inappropriate photographs of medical colleagues intoxicated on social media [12]. In this context, the findings of cross-sectional survey of the public are relevant; it reported that inappropriate use of social media by physicians, including images of intoxication, would cause patients to trust them less [13]. Such implications have been highlighted by medical ethicists [14].

The phenomenon is not restricted to doctors – over half of respondents in a survey of registered nurses said that they had witnessed inappropriate online behaviour among colleagues [15].

Furthermore, postgraduate programme directors frequently check the social media profiles of residency applicants for inappropriate behaviour [16].

1  
2  
3 Recent research surveys of medical students, residents and consultants, reported that almost one  
4  
5 third of students had posted inappropriate photographs of themselves on social media; the findings  
6  
7 among residents and consultants were significantly lower [17]. This raises the question of whether  
8  
9 there is an effect for age in the use of social media; a systematic review examining the impact of  
10  
11 social media on medical professionals encouraged intergenerational dialogue [18].  
12  
13

14  
15 Physicians and students may be unsure of the full medical, professional, and personal reputational  
16  
17 consequences of the new social media age [19, 20]. Ethical concerns also include the public-  
18  
19 professional and private-personal spheres. Few qualitative studies examining the views of medical  
20  
21 students and those of their clinical supervisors on this topic exist. The aim of this study was to  
22  
23 explore general practitioners' (GPs) and medical students' perspectives on and experience of social  
24  
25 media. Specific objectives were to investigate how students and their GP-tutors utilise social media;  
26  
27 what challenges they encounter in keeping boundaries between professional and personal identities  
28  
29 and private and public realms; how they negotiate these challenges and conduct themselves  
30  
31 professionally when using online platforms.  
32  
33  
34  
35  
36  
37  
38

## 39 **Methodology**

### 40 41 **Study design**

42  
43 The study adhered to the COREQ [Consolidated criteria for reporting qualitative research] principles  
44  
45 for reporting qualitative research (supplementary material 1) [21]. Ethical approval was granted by  
46  
47 the University of Limerick Education and Health Science Faculty Ethics Committee [2017\_05\_17\_EHS].  
48  
49 Participants were contacted by email sent from a research administrator who was not involved in  
50  
51 course teaching and assessment, thus ensuring no power dynamic or coercion. This study utilised a  
52  
53 hybrid methodology whereby an in-depth, semi-structured interview based on a topic guide designed  
54  
55  
56  
57  
58  
59  
60

1  
2  
3 by the research team was followed, for some participants, by a second interview structured using  
4  
5 short ethical dilemmas on social media described here as vignettes.  
6  
7

### 8 **Setting and Participants**

9

10  
11 Participants were GP tutors and third year medical students who had just completed a longitudinal  
12  
13 integrated clerkship [22]. Five medical students and three GPs participated in the study. Purposive,  
14  
15 non-probabilistic, sampling was used to ensure that a balance was achieved between students from  
16  
17 Europe and North America and that both male and females were selected to be as representative as  
18  
19 possible of the student population. The characteristics of the participants are outlined in table 1. As  
20  
21 judgemental sampling involves the judgement of the researchers based, for example, on their  
22  
23 expertise and knowledge of previous research it was decided to base the sample size on a previous  
24  
25 qualitative study on medical student mobile phone usage [23]. The interview process worked through  
26  
27 the eight participants until no new themes were emerging. This is known as data saturation- the  
28  
29 'stopping criterion' [24] for the data collection being met as those being interviewed are repeating  
30  
31 themes mentioned by others or are not suggesting new themes.  
32  
33  
34

35  
36 {Insert table 1 here}

### 37 **Public and patient involvement**

38  
39

40  
41 No patients were involved in the study, but the research question was derived from classroom  
42  
43 discussions and interactions with medical students GP-tutors.  
44  
45  
46

### 47 **Conceptual framework**

48  
49

50  
51 'Communities of practice' is a popular theory for conceptualising the development of medical  
52  
53 professional identity [25], whereby the medical profession is understood both as a "collegial  
54  
55 profession and community of practice" [25]. The theory states that successful identity formation  
56  
57 depends on a dynamic interplay between members of the medical community at different stages of  
58  
59 the medical continuum. To this end social media can supplement but not replace "meaningful contact  
60



1  
2  
3 with members of the community”, which is considered in this framework to be the most important  
4  
5 factor in professional identity formation [25].  
6  
7

### 8 **Data Collection**

9

10  
11 The interview guide was developed by an interdisciplinary team, and vignettes were developed by two  
12  
13 of the research team (ES, AOR) with the purpose of exploring students’ and clinicians’ responses to  
14  
15 examples of unprofessional behaviour online by healthcare workers (supplementary material 2).  
16  
17 These vignettes were designed so that doctors and medical students could give ethical and  
18  
19 professional perspectives not simply on themselves but also on those with whom they work and will  
20  
21 be working in their medical careers. Participants were asked to respond to three separate scenarios  
22  
23 which required them to consider the ethical dilemmas and professional practice challenges of using  
24  
25 social media personally and professionally. Where the themes explored in the vignettes were  
26  
27 addressed by the participants in their initial interview they were not interviewed again with the aid of  
28  
29 the vignettes.  
30  
31  
32

33  
34 Interviews were conducted by a trained female researcher (MM), who would have known some of the  
35  
36 participants and lasted between 15 and 30 minutes. These were conducted either by telephone, Skype  
37  
38 or in person and were digitally recorded, with the explicit consent of those participating. Where  
39  
40 participants were invited to a second interview, if their first interview had not addressed the themes  
41  
42 in the vignettes, they were shown or read short vignettes about use of social media and their opinions  
43  
44 were elicited.  
45  
46  
47

### 48 **Data analysis**

49

50  
51 The methodology utilised was template analysis. A coding template based on representative parts of  
52  
53 the data is developed, and, subsequently, is revised and refined [26]. It facilitates the use of a priori  
54  
55 themes which can later be modified or excluded as the data analysis evolves, as the researchers read  
56  
57 and re-read the data. The identification of templates is thus iterative in nature - some are established  
58  
59  
60

1  
2  
3 initially as more important and then, after thorough reading and re-reading of the data transcripts,  
4  
5 may be seen as less important or more important. This helps to compare perspectives between  
6  
7 different categories of participant, in this case, GPs and medical students. It is a practical method that  
8  
9 is well suited to a team involving multiple coders as it gives the freedom to the team to collaborate on  
10  
11 the direction and content of the coding. The process involved over six meetings of the coders (AOR,  
12  
13 VN, JOD).  
14  
15

16  
17 Initially, the coders read the full interview texts to familiarise themselves with the raw data.  
18  
19 Preliminary data coding was conducted independently with the use of a priori themes that the  
20  
21 researchers expected to appear in the data; only a priori themes related to the research question were  
22  
23 chosen. These included benefits of social media, personal and professional use, and potential pitfalls.  
24  
25 The initial codes and themes were used to define a coding template; this facilitated the researchers  
26  
27 to understand the relationship between the codes and themes, whilst maintaining flexibility so that  
28  
29 more codes and themes could be added as the hierarchical analysis developed. Coders discussed  
30  
31 personal experiences with social media and attitudes towards the scenarios in the vignettes, a process  
32  
33 known as “active-acknowledgement” for overcoming researcher bias [27]. Discrepancies were  
34  
35 resolved by personal reflection and ongoing dialogue between the data analysis team.  
36  
37  
38  
39  
40  
41  
42

### 43 **Findings**

44  
45  
46 The analysis produced three overarching themes, each with subthemes that were often  
47  
48 interconnected and, in some cases, had overlapping ideas.  
49

#### 50 51 **1. Staying in contact and up to date**

52  
53  
54 This theme refers to the practical, day-to-day applications of social media for medical students and  
55  
56 GPs. Social media has undoubted social and networking benefits, and these were highlighted by  
57  
58 participants, as well as the challenging nature of the information available- which can help participants  
59  
60

1  
2  
3 stay up to date, but which can waste time also. This theme has been divided into two subthemes:  
4  
5 'staying connected' and 'educational tool'.  
6  
7

### 8 **1.1 Staying connected**

9

10  
11 Maintaining friendships and staying in touch with others was the primary stated use of social media  
12  
13 platforms. One student said how helpful Facebook was in keeping touch with family throughout the  
14  
15 world and with a network of friends from a previous course, while another felt that the speed and  
16  
17 ease of access may come at the cost of maintaining meaningful relationships.  
18

19  
20  
21 *"perhaps they are superficial relationships, but you know I feel like if I didn't have 'Facebook',*  
22  
23 *particularly I would absolutely lose contact with these people."* [student, male]  
24

25  
26 Social media was perceived as very useful for staying in touch, but there appeared to be an awareness  
27  
28 of the link between social media abuse when interviewing for jobs or being publicly castigated for  
29  
30 holding the 'wrong' view on a contentious topic.  
31

32  
33  
34 *"I am very conscious about putting up things like my date of birth, things about politics... of not giving*  
35  
36 *away too much about myself."* [student, female]  
37

38  
39 In this quote there is both the appreciation of confidential personal details such as "date of birth" but  
40  
41 also the sense that there are areas which are personal and private, such as political views. This raised  
42  
43 the idea that students and GPs alike were aware of the importance of boundary setting and so social  
44  
45 media must be approached carefully.  
46  
47  
48  
49  
50

### 51 **1.2 'Educational tool'**

52

53  
54 This subtheme describes how, on one hand, social media platforms have significantly enhanced  
55  
56 learning but, on the other, must be handled with care. Concerns about social media distracting from  
57  
58 learning were evident for GPs and students:  
59  
60

1  
2  
3 *“you can spend hours and hours just scrolling going from Twitter to Facebook to LinkedIn.” [general*  
4  
5 *practitioner, male]*

6  
7  
8 *“99% of the time it is just for killing time.” [student, male]*  
9

10  
11 Some medical experts post clinical pictures and scenarios and invite students to suggest differential  
12 diagnoses, often giving the correct answer and an explanation at a later point. While this was  
13 appreciated by one student in the interview, in the follow-up vignette discussion he then questioned  
14 the professional ethics of posting patient information in a publicly accessible forum, and the concepts  
15 of consent and confidentiality were raised. When asked about professional concerns relating to one  
16 vignette (on online sharing of clinical educational material) all participants acknowledged the  
17 importance of confidentiality.  
18  
19

20  
21 *“I think you need to be careful about what you post. Personally, for myself, as a rule of thumb, I don’t*  
22 *think you should post anything about clinical... a clinical scenario or anything because that could get*  
23 *you into trouble.” [student, female]*  
24  
25

26  
27 Most noticeable in this last statement is the tension between a very useful medical pedagogical tool,  
28 which may benefit medical students, and the ethicality of referring to identifiable patient case studies.  
29  
30  
31  
32  
33  
34

## 35 36 37 38 39 40 41 42 43 **2. Online persona**

44  
45 This theme analyses the process whereby learners at all stages of the medical continuum negotiate  
46 an online image and attempt to balance personal and professional dimensions. There are three  
47 subthemes: ‘crafting an image’, ‘societal expectations’ and ‘boundaries are blurring’.  
48  
49  
50  
51  
52  
53  
54

### 55 56 **2.1 Crafting an image**

57  
58  
59  
60

1  
2  
3 Participants agreed that care had to be taken with how medical students/clinicians present  
4 themselves online. Students and GPs were aware that various platforms serve very different  
5 purposes. Both groups indicated a degree of embarrassment with self-promotion on social media. All  
6 participants were conscious of how they would be perceived by the public. Several felt it was  
7 important to be selective with what gets posted to craft a positive image:  
8  
9

10  
11  
12 *“you can hold an image of yourself... put up the photos where you look good are having a wonderful*  
13 *time.... I suppose also, some people open their hearts a bit too much... it probably doesn't cast them in*  
14 *the best light even if that is not their intention.” [student, male]*  
15  
16

17  
18  
19 Another student explained this concept further, detailing how he restricted what he posted to paint  
20 an almost superhuman version of himself.  
21  
22

23  
24  
25 *“the image you are trying to maintain could be what you identify with or what you want to identify*  
26 *with, but you are not really that, so kind of detachment is potentially harmful particularly with young*  
27 *people.... There is a culture of social media that is centred around vanity and around what you want to*  
28 *identify with versus what you actually identify with.” [student, male]*  
29  
30  
31  
32  
33  
34  
35

36  
37 This quote strongly points to the tensions and pressures in emotional self-regulation involved in using  
38 such impression management strategies. It also highlights the danger, when using social media, of a  
39 cognitive dissonance between the image medical students and doctors wish to project and the extent  
40 to which this image accurately reflects who they are.  
41  
42  
43  
44  
45  
46  
47  
48  
49

## 50 **2.2 Societal expectations**

51  
52 This theme considers how participants think society might view them when using social media. An  
53 experienced GP participant felt strongly that society expects something more from medical students  
54 compared to other students as they are “future doctors”. This question as to whether society should  
55 expect a higher standard for doctors permeated most of the interviews.  
56  
57  
58  
59  
60

1  
2  
3 *“maybe somebody looking on would say... ‘I don’t care if my plumber has 20 pints at the weekend... or*  
4 *I see them on ‘Facebook’ running... with no clothes on’ – but I don’t want to see a GP on Monday*  
5 *morning who has been doing that.” [general practitioner, male]*  
6  
7  
8  
9

10 The fear of reputation damage was balanced with the realisation that we cannot all be perfect all the  
11 time. One student described this succinctly but still advised the utmost caution when using social  
12 media:  
13  
14  
15  
16

17  
18 *“We are only human. I mean, God forbid, Watson and Crick who discovered DNA, I am sure they were*  
19 *mad for their lush [alcohol] every once in a while, but who cares?” [student, male]*  
20  
21  
22

23 Other students took an opposing view and expressed in both interview and follow-up vignette the  
24 need to maintain professional conduct on and off duty.  
25  
26  
27

28 *“They have a reputation to maintain and here they are not representing themselves in a professional*  
29 *manner.” [student, male]*  
30  
31  
32

33 In some instances, there was dissonance between the view expressed by a participant in the interview  
34 and that of the same participant in the follow-up vignettes. One student, when asked about societal  
35 expectations, cited the example of a picture shared on a social media platform of a doctor smoking a  
36 cigarette, saying that it made no sense for that doctor then to be telling patients not to smoke. When  
37 asked to comment on the vignette where a patient expressed concern about doctors who were  
38 potentially going to operate on her and had appeared drunk on a social media platform, she  
39 responded:  
40  
41  
42  
43  
44  
45  
46  
47  
48

49 *“I would tell her that doctors can’t be doctors all of the time” [student, female]*  
50  
51  
52

53 A very striking example of this is the extent to which doctors are now having to demarcate their public  
54 and private life is the remark from one GP about how they had been told to circumvent their social  
55 media behaviour at a wedding:  
56  
57  
58  
59  
60

1  
2  
3 *"I suppose you can try to make it as private as you can, but I don't know if people entirely understand*  
4 *the rules of it, you know when pictures go up I don't think you're even able to take them down or that*  
5 *kind of thing. I think people are kind of wary of that you know when pictures are being taken on a night*  
6 *out or something you know people might say "don't put them on Facebook". I was at a wedding*  
7 *recently of a doctor and there was a request on the invite not to put any pictures up on social media."*  
8  
9  
10  
11  
12  
13  
14 *(general practitioner, female)*  
15

16  
17  
18  
19  
20  
21  
22  
23  
24  
25  
26  
27  
28  
29  
30  
31  
32  
33  
34  
35  
36  
37  
38  
39  
40  
41  
42  
43  
44  
45  
46  
47  
48  
49  
50  
51  
52  
53  
54  
55  
56  
57  
58  
59  
60

Aside from doctors not being allowed to have a personal life or having to be aware that parts of it may be captured inadvertently on social media such that they must take steps to prevent this, there is also the sense that the rules for social media usage are evolving but that this GP and others are not clear what those rules are and who is deciding upon them.

### 2.3 Boundaries are blurring

This subtheme refers to the changing dynamic between doctors and patients to which social media is contributing. GP participants agreed that it was not unusual to have friends who might be taken on as patients or to have social interaction in the community with existing patients. However, the introduction of social media has the potential to destroy privacy and to blur the boundary between personal and professional.

Friend requests on 'Facebook' were cited by many students and GPs as a potential source of compromise with all viewing it as an inappropriate relationship, fraught with possibilities of doctors' personal information being inappropriately viewed as well as the potential for medical advice being requested online. The risk to patient safety brought about by casual contact and giving of advice in a non-clinical and more relaxed social media environment was pointed out. One GP emphasised maintaining a division between personal and professional life:

1  
2  
3 *"It is about keeping things separate. Your personal life and your professional life." [general*  
4 *practitioner, male]*  
5  
6  
7

8 This points, once again, to the need for individual doctors to decide where they are going to draw their  
9 boundary lines with their patients online. Many participants talked about withdrawing from social  
10 media interaction or making it difficult for the public to find them. Given that we are all fallible one  
11 GP highlighted the need for doctors to be careful about how they use social media:  
12  
13  
14  
15  
16

17  
18 *"I would try and avoid it. I think the importance of being a good doctor is to limit yourself. So, for*  
19 *example you would, you can't be good 24-7. You can't be empathic 24-7. We are all human, we have*  
20 *moods, we say the wrong thing, we do the wrong thing. I can only imagine someone Facebook*  
21 *messaging me that they have a bit of indigestion or a bit of headache or something along those lines*  
22 *and me not responding or me responding in an off-handed way in a less than professional manner and*  
23 *then the inevitable happens, they have pneumonia, they have meningitis, they have cardiac issues or*  
24 *something and of course they have contacted me and I have contacted them and it has been*  
25 *unprofessional and that means that I am partly responsible for what happened. So, I am very wary of*  
26 *patients using social media to contact me"* (general practitioner, male)  
27  
28  
29  
30  
31  
32  
33  
34  
35  
36  
37  
38

39 This ties into the final theme of what exactly is proper use of social media by doctors.  
40  
41  
42  
43  
44  
45  
46  
47

### 48 **3 Towards standards and safety**

49

50 This final theme illustrates the current uncertainty regarding what it means to be a medical  
51 professional on social media. There are two subthemes – 'clarifying the standard' and 'safe  
52 navigation'.  
53  
54  
55  
56  
57  
58  
59  
60



### 3.1 Clarifying the standard

While the data shows that there is awareness among all participants of some ethical dimensions and legal ramifications of poor conduct on social media, there was no clear consensus on what is acceptable. One GP, while aware of the limitations of his own experience with social media, expressed concern for medical students:

*“people who have spent all their waking hours for the last ten years stuck in a room swotting, most of them don’t have life experience and are not worldly-wise and therefore are very innocent... they are just not aware of the huge implications this can have on their future so I think that needs to be spelled out very clearly and explicitly.” [general practitioner, male]*

GPs and students appeared to disagree on whether clinical experiences could be shared online for teaching and reflective purposes. The vignettes magnified this uncertainty and were useful in presenting examples of where such social media dilemmas might occur. Most of the GPs believed that there was insufficient guidance provided for them and for students. They agreed that a clear set of guidelines was necessary that would uphold good professional conduct while protecting individuals who, in their leisure time, were trying to unwind:

*“It is a stressful enough job. You would hate to think that people would be told that you can never let your hair down, you can never do this or that. I think there has to be a balance somewhere.” [general practitioner, female]*

This quote underlines the imperative of educating future and current physicians in the use of social media to achieve a private social life.

### 3.2 Safe Navigation

This final subtheme connects the perceptions found throughout the data on how students and GPs might successfully and safely navigate social media platforms, accessing education and connecting

1  
2  
3 with others, while at the same time keeping themselves plus their current and future patients safe.

4  
5 GPs were very clear on what type of information should not be divulged on social media platforms:

6  
7  
8 *“Any info. that you think could harm you, your family or your patients.” [ general practitioner, female]*

9  
10  
11 The follow-up vignettes revealed that for three of the students, there was a high level of awareness  
12  
13 of risks with sharing information online. They recognised the potential for litigation and damaged  
14  
15 career opportunities as consequences of inappropriate use of social media platforms. However, a  
16  
17 fourth student, did not appear to have this level of awareness and was actively engaging in  
18  
19 broadcasting her own clinical experiences seemingly without awareness of the dangers:

20  
21  
22  
23 *“I have a [You Tube] channel that I just started, and I am just uploading some videos about my life...  
24  
25 about medicine”*

26  
27  
28 *[Interviewer] Do you think there are any risks with that?*

29  
30  
31 *“no, not really.” [student, female]*

32  
33  
34 There was no evidence among participants of any level of participation in formal education on  
35  
36 engaging social media, and for most, awareness seemed to come from life experience. One student  
37  
38 told how lessons learned about life as a younger girl influenced her behaviour on SMPs:

39  
40  
41 *“ My dad used to always give us lectures about pictures which I totally understand so I do have certain  
42  
43 settings on ‘Facebook’ which only allows... not even all my friends to see my photos” [student, female]*

44  
45  
46 There was a notable lack of awareness of the existence of guidelines among both groups of  
47  
48 participants. All agreed that, in general, social media can be positive thing, but most urged caution  
49  
50 and showed awareness of risk.

51  
52  
53  
54 *“I think overall, social media is great but just be careful with it. That is the long and the short of it.”  
55  
56 [general practitioner, male]*

## Discussion

The analysis has provided new insights into the research question exploring GPs and medical students experience of and perspectives on social media use and behaviour. While educational and networking benefits to the profession exist, most expressed unease about boundary setting and staying safe on these platforms. GPs and medical students appeared to agree that there was a line between professional and personal realms that needed to be maintained, but for medical students, defining where that boundary lies was difficult to conclude.

The scenario that caused the most disagreement among participants related to a video of doctors behaving unprofessionally during their time off, with some defending them and others saying it was unacceptable to behave in a certain way at any time. The statement in our study that “doctors can’t be doctors all of the time” is a dominant theme. An important point in our study is the discordance between what participants think and what they say, as illustrated by the follow up interview seeking their reactions to vignettes. Other research has reported similar inconsistencies, where respondents acknowledged that inappropriate social media use was common but were far more likely to interpret the behaviour as being inappropriate when it was reported among colleagues rather than themselves [17]. Establishing boundaries in a social media age is difficult for all citizens but especially for doctors as they expected to practise to the highest level. The quote regarding Crick and Watson was very apposite in this respect.

The theme of ‘crafting an image’ refers to the efforts of medical students and physicians to portray themselves favourably on social media. This phenomenon has been described as an online “identity crisis” for medical professionals [28]. Researchers have warned of the problem of conflating “self-expression, self-promotion and self-communication” [29]. Research with health care professionals on the subject of ‘digital identity’ formation identified the potential for conflict when professional, personal, public and private identities did not align [30]. The ‘communities of practice’ theory of identity formation addresses how personal and professional identities should be congruent. To this

1  
2  
3 end, role-modelling, mentoring, experiential learning, reflection, and support from medical educators  
4  
5 are important.  
6  
7

8 The concept of dual relationships, whereby professionals and the public interact formally at times  
9  
10 and informally at other times is brought to a greater level of acuity by social media where 'context  
11  
12 collapses'- a point emphasised in our data [31]. Formal education at medical school in digital  
13  
14 professional identity formation in medical school curricula is thus important as is subsequent  
15  
16 professional accreditation [32]. Some of the participants in our study were aware of which social  
17  
18 media platforms to use for various purposes and how to use privacy settings to ensure safety.  
19

20  
21  
22 Scholars have called for systematic approaches to the instruction of e-professionalism so that it can  
23  
24 be incorporated into existing curricula [33].  
25

26  
27 The generational difference between the two groups of participants - students and general  
28  
29 practitioners, is another important consideration. The so-called 'generation Z' or millennials who have  
30  
31 grown up with social media are thought to be more aware of its use for personal branding and career  
32  
33 promotion [34]. This raises the matter of how these generations may have experienced social media  
34  
35 differently and how it may be an important effect- the 'cohort effect' as it is known in research on  
36  
37 depression, for example, where younger generations report greater incidence of depression [35].  
38  
39 Without negating the cohort effect theory, the participants' responses on social media were striking  
40  
41 in that they raised similar themes to the GPs, e.g. of the effect posting intemperate remarks or ill-  
42  
43 advised images would have on a medical practitioner's career. This suggests a 'trans-generational'  
44  
45 appreciation of the gravitas associated with medical practice which may be affected by the increasing  
46  
47 presence of social media in our personal and private lives.  
48  
49  
50

51  
52 Guidance from medical educators in the USA advised reflection on social media identity, and with  
53  
54 who and how they will interact [36]. The seriousness of inappropriate social media use is recognised  
55  
56 by training bodies [37], and early reports of pilot interventions designed to teach social media  
57  
58 professionalism have met with success [38].  
59  
60

### Strengths and weaknesses

The “two stage” nature of the study, involving in depth interviews followed up by a phone call soliciting views on hypothetical scenarios, was a particular strength as it allowed participants to reflect on their views. A useful cross-cultural element was the participation of GPs and medical students from Ireland and North America. The use of a theoretical framework facilitated understanding of the data in terms of prior knowledge and theory, while allowing flexibility to incorporate new themes. Limitations of the study were its location in a single medical school in Ireland and the small sample size. The results may not be transferrable to other countries and may not be reflective of younger medical students and older clinicians. The interviewer was known to most of the participants which, on one hand, may exaggerate the propensity of participants to give socially desirable answers in the context of behaviour – a phenomenon known as social desirability bias [39]; on the other, it may produce richer data due to the easy establishment of rapport and trust [40].

### Implications for further research and practice

Research is warranted to identify how best to teach safe practices for engaging with social media. Clear and dynamic guidelines for medical students and GPs are needed for ethical social media use in the medical profession due to the rapidly changing speed and scope of social media.

We have outlined operational guidance based on the study findings for professional practice:

- Medical educators should support students to use social media as a means of engaging in communities of practice with peers and senior colleagues.
- Existing medical curricula must incorporate social media policies and formal instruction on e-professionalism.

- Educators should acknowledge the tensions between personal and professional identities.
- Specific guidance is needed for students on what is appropriate to post and where and with whom it is appropriate to interact.
- We have identified a need for skills teaching on how identities are developed and the setting of boundaries and this may extend beyond social media use.

## Conclusion

Students and GPs view social media as a positive resource for the medical profession. Guidance is required for students and medical practitioners on how to establish reasonable boundaries between their personal and professional presence on social media and in their right to a private life in which ineffective use of social media does not negatively affect career prospects.

## Acknowledgements

The authors are grateful to the students who inspired and contributed to the study as well as the GP tutors on the School of Medicine's ULEARN-GP network.

## Contributors

MM was involved in the study design, data collection and analysis and helped to write the first draft; VN was involved in the data analysis and write up, ES was involved in study design, oversight, analysis and write-up; JMD was involved in the data analysis and write up; ROC was involved in data analysis, write-up; JOD was involved in study design, data analysis and write-up; AOR was involved in all stages of the project. Each author contributed to all drafts of the paper and read and approved the final manuscript.

## Competing interests

1  
2  
3 We have read and understood BMJ policy on declaration of interests and declare that we have no  
4  
5 competing interests.  
6  
7

8 **Ethics approval** University of Limerick Department of Education and Health Sciences Research  
9  
10 Ethics Committee; 2017\_05\_17\_EHS  
11  
12

13 **Provenance and peer review** Not commissioned; externally peer reviewed.  
14  
15

16 **Data sharing statement** No additional data are available.  
17  
18

19 **Funding** – funding for publication was provided by the University of Limerick  
20  
21  
22  
23  
24  
25  
26  
27  
28  
29  
30  
31  
32  
33  
34  
35  
36  
37  
38  
39  
40  
41  
42  
43  
44  
45  
46  
47  
48  
49  
50  
51  
52  
53  
54  
55  
56

57 **References**  
58  
59  
60

1. Kaplan AM, Haenlein M. Users of the world, unite! The challenges and opportunities of Social Media. *Business horizons*. 2010 1;53(1):59-68.
2. McNeill A, Harris PR, Briggs P. Twitter influence on UK vaccination and antiviral uptake during the 2009 H1N1 pandemic. *Frontiers in public health*. 2016;4:26.
3. Ahani A, Nilashi M. Coronavirus outbreak and its impacts on global economy: the role of social network sites. *Journal of Soft Computing and Decision Support Systems*. 2020;7[2]:19-22.
4. Smailhodzic E, Hooijsma W, Boonstra A, Langley DJ. Social media use in healthcare: a systematic review of effects on patients and on their relationship with healthcare professionals. *BMC health services research*. 2016;16[1]:442.
4. Giustini D, Ali SM, Fraser M, Boulos MNK. Effective uses of social media in public health and medicine: a systematic review of systematic reviews. *Online Journal of Public Health Informatics*. 2018;10[2].
5. Kind T. Professional guidelines for social media use: a starting point. *AMA journal of ethics*. 2015;17[5]:441-7.
6. Chauhan B, George R, Coffin J. Social media and you: what every physician needs to know. *J Med Pract Manage*. 2012;28[3]:206-9.
7. O'Sullivan E, Cutts E, Kavikondala S, Salcedo A, D'Souza K, Hernandez-Torre M, et al. Social media in health science education: an international survey. *JMIR Medical Education*. 2017;3[1]:e1.
8. Barlow CJ, Morrison S, Stephens HO, Jenkins E, Bailey MJ, Pilcher D. Unprofessional behaviour on social media by medical students. *Medical Journal of Australia*. 2015;203[11]:439-.
9. Garner J, O'Sullivan H. Facebook and the professional behaviours of undergraduate medical students. *The clinical teacher*. 2010;7[2]:112-5.
10. Kitsis EA, Milan FB, Cohen HW, Myers D, Herron P, McEvoy M, et al. Who's misbehaving? Perceptions of unprofessional social media use by medical students and faculty. *BMC medical education*. 2016;16[1]:1-7.



- 1  
2  
3 11. Diller D, Yarris LM. A descriptive analysis of the use of Twitter by emergency medicine  
4 residency programs. *Journal of graduate medical education*. 2018; 10(1):51-5.  
5  
6
- 7 12. Garg M, Pearson DA, Bond MC, Runyon M, Pillow MT, Hopson L, Cooney RR, Khadpe J, Nomura  
8 JT, Inboriboon PC. Survey of individual and institutional risk associated with the use of social media.  
9  
10 *Western Journal of Emergency Medicine*. 2016; 17(3):344.  
11  
12
- 13 13. Fatollahi JJ, Colbert JA, Agarwal P, Lee JL, Lehmann EY, Yuan N, Lehmann LS, Chretien KC. The  
14 impact of physician social media behavior on patient trust. *AJOB empirical bioethics*. 2020; 2;11(2):77-  
15  
16 82.  
17  
18
- 19 14. Snyder L. Online professionalism: social media, social contracts, trust, and medicine. *The*  
20  
21 *Journal of clinical ethics*. 2011; 22(2):173-5.  
22  
23
- 24 15. Wang Z, Wang S, Zhang Y, Jiang X. Social media usage and online professionalism among  
25  
26 registered nurses: a cross-sectional survey. *International journal of nursing studies*. 2019; 98:19-26.  
27  
28
- 29 16. Langenfeld SJ, Vargo DJ, Schenarts PJ. Balancing privacy and professionalism: a survey of  
30  
31 general surgery program directors on social media and surgical education. *Journal of surgical*  
32  
33 *education*. 2016 Nov 1;73(6):e28-32.  
34  
35
- 36 17. Pronk SA, Gorter SL, van Luijk SJ, Barnhoorn PC, Binkhorst B, van Mook WN. Perception of  
37  
38 social media behaviour among medical students, residents and medical specialists. *Perspectives on*  
39  
40 *Medical Education*. 2021; 7:1-7.  
41  
42
- 43 18. Mak-Van Der Vossen, M., Van Mook, W., Van Der Burgt, S., Kors, J., Ket, J. C., Croiset, G., &  
44  
45 Kusrkar, R. Descriptors for unprofessional behaviours of medical students: a systematic review and  
46  
47 categorisation. *BMC medical education*. 2017; 17[1], 164.  
48  
49
- 50 19. Gholami-Kordkheili F, Wild V, Strech D. The impact of social media on medical professionalism:  
51  
52 a systematic qualitative review of challenges and opportunities. *Journal of medical Internet research*.  
53  
54 2013;15[8]:e184.  
55  
56
- 57 20. O'Regan A, Smithson WH, Spain E. Social media and professional identity: pitfalls and  
58  
59 potential. *Medical teacher*. 2018;40[2]:112-6.  
60

- 1  
2  
3 21. Tong A, Sainsbury P, Craig J. Consolidated criteria for reporting qualitative research[COREQ]:  
4 a 32-item checklist for interviews and focus groups. International journal for quality in health care.  
5  
6 2007;19[6]:349-57.  
7
- 8  
9 22. O'Regan A, Hayes P, O'Connor R, Casey M, O'Dwyer P, Culhane A, et al. The University of  
10 Limerick Education and Research Network for General Practice[ULEARN-GP]: practice characteristics  
11 and general practitioner perspectives. BMC family practice. 2020;21[1]:1-11.  
12  
13
- 14 23. Rashid-Doubell F, Mohamed S, Elmusharaf K, O'Neill C. A balancing act: a phenomenological  
15 exploration of medical students' experiences of using mobile devices in the clinical setting. BMJ open.  
16 2016;6[5].  
17  
18
- 19 24. Francis JJ, Johnston M, Robertson C, Glidewell L, Entwistle V, Eccles MP, et al. What is an  
20 adequate sample size? Operationalising data saturation for theory-based interview studies.  
21 Psychology and health. 2010;25[10]:1229-45.  
22  
23
- 24 25. Cruess SR, Cruess RL, Steinert Y. Supporting the development of a professional identity:  
25 general principles. Medical teacher. 2019 Jun 3;41(6):641-9.  
26  
27
- 28 26. Brooks J, McCluskey S, Turley E, King N. The utility of template analysis in qualitative  
29 psychology research. Qualitative research in psychology. 2015;12[2]:202-22.  
30  
31
- 32 27. Berger R. Now I see it, now I don't: Researcher's position and reflexivity in qualitative research.  
33 Qualitative research. 2015;15[2]:219-34.28. DeCamp M, Koenig TW, Chisolm MS. Social media  
34 and physicians' online identity crisis. Jama. 2013;310[6]:581-2.  
35  
36
- 37 28. DeCamp M, Koenig TW, Chisolm MS. Social media and physicians' online identity crisis. Jama.  
38 2013;310[6]:581-2.  
39  
40
- 41 29. Van Dijck J. 'You have one identity': performing the self on Facebook and LinkedIn. Media,  
42 culture & society. 2013;35[2]:199-215.  
43  
44
- 45 30. Ruan B, Yilmaz Y, Lu D, Lee M, Chan TM. Defining the Digital Self: A Qualitative Study to Explore  
46 the Digital Component of Professional Identity in the Health Professions. Journal of medical Internet  
47 research. 2020;22(9):e21416.  
48  
49  
50  
51  
52  
53  
54  
55  
56  
57  
58  
59  
60

- 1  
2  
3 31. Sugimoto C, Hank C, Bowman T, Pomerantz J. Friend or faculty: Social networking sites, dual  
4 relationships, and context collapse in higher education. *First Monday*. 2015.  
5  
6
- 7 32. Jawed S, Mahboob U, Yasmeen R. Digital professional identity: Dear Internet! Who am I?  
8  
9 *Education for Health*. 2019;32[1]:33.  
10  
11
- 12 33. Wissinger CL, Stiegler Z. Using the extended parallel process model to frame e-professionalism  
13 instruction in healthcare education. *Teaching and learning in medicine*. 2019 May 27;31(3):335-41.  
14  
15
- 16 34. Vițelar A. Like me: Generation Z and the use of social media for personal branding.  
17  
18 *Management Dynamics in the Knowledge Economy*. 2019;7(2):257-68.  
19  
20
- 21 35. MacDonagh, J. (2016). Depression and anxiety. In P. Greasley & A. Torn, (Eds.). *Psychology for*  
22  
23 *Nurses*. Cambridge: Polity.  
24  
25
- 26 36. Kind T, Patel PD, Lie DA. Opting in to online professionalism: social media and pediatrics.  
27  
28 *Pediatrics*. 2013 Nov 1;132(5):792-5.  
29  
30
- 31 37. Pillow MT, Hopson L, Bond M, Cabrera D, Patterson L, Pearson D, Sule H, Ankel F, Fernández-  
32 Frackelton M, Hall RV, Kegg JA. Social media guidelines and best practices: recommendations from the  
33 Council of Residency Directors Social Media Task Force. *Western Journal of Emergency Medicine*.  
34  
35 2014; 15(1):26.  
36  
37
- 38 38. Geyer E, Irish E, Hagzan A, Wiczulis A. Social Media and Online Professionalism Integrated into  
39  
40 Year 3 OB/GYN Clerkship#. *Medical Reference Services Quarterly*. 2020 Oct 1;39(4):359-69.  
41  
42
- 43 39. Nederhof AJ. Methods of coping with social desirability bias: A review. *European journal of*  
44  
45 *social psychology*. 1985; 15(3):263-80.  
46  
47
- 48 40. Devotta K, Woodhall-Melnik J, Pedersen C, Wendaferew A, Dowbor TP, Guilcher SJ, Hamilton-  
49  
50 Wright S, Ferentzy P, Hwang SW, Matheson FI. Enriching qualitative research by engaging peer  
51  
52 interviewers: A case study. *Qualitative research*. 2016; 16(6):661-80.  
53  
54  
55  
56  
57  
58  
59  
60

*Table 1: Participant Characteristics*

| GPs/ final year                 | Gender[M/F] | Age Category               | Style of                                     |
|---------------------------------|-------------|----------------------------|----------------------------------------------|
| Medical Student                 |             | [20-30], [30-40],<br>[40+] | Interview [face<br>to face, phone,<br>Skype] |
| Interview 1: GP                 | F           | 30-40                      | Phone                                        |
| Interview 2: GP                 | M           | 30-40                      | Phone                                        |
| Interview 3:<br>Medical Student | M           | 20-30                      | Skype                                        |
| Interview 4:<br>Medical Student | M           | 20-30                      | Face-to-face                                 |
| Interview 5:<br>Medical Student | M           | 20-30                      | Face-to-face                                 |
| Interview 6:<br>Medical student | F           | 30-40                      | Face-to-face                                 |
| Interview 7: GP                 | M           | 40+                        | Face-to-face                                 |
| Interview 8:<br>Medical student | F           | 20-30                      | Face-to-face                                 |

## COREQ (COnsolidated criteria for REporting Qualitative research) Checklist

A checklist of items that should be included in reports of qualitative research. You must report the page number in your manuscript where you consider each of the items listed in this checklist. If you have not included this information, either revise your manuscript accordingly before submitting or note N/A.

| Topic                                          | Item No. | Guide Questions/Description                                                                                                                              | Reported on Page No. |
|------------------------------------------------|----------|----------------------------------------------------------------------------------------------------------------------------------------------------------|----------------------|
| <b>Domain 1: Research team and reflexivity</b> |          |                                                                                                                                                          |                      |
| <i>Personal characteristics</i>                |          |                                                                                                                                                          |                      |
| Interviewer/facilitator                        | 1        | Which author/s conducted the interview or focus group?                                                                                                   |                      |
| Credentials                                    | 2        | What were the researcher's credentials? E.g. PhD, MD                                                                                                     |                      |
| Occupation                                     | 3        | What was their occupation at the time of the study?                                                                                                      |                      |
| Gender                                         | 4        | Was the researcher male or female?                                                                                                                       |                      |
| Experience and training                        | 5        | What experience or training did the researcher have?                                                                                                     |                      |
| <i>Relationship with participants</i>          |          |                                                                                                                                                          |                      |
| Relationship established                       | 6        | Was a relationship established prior to study commencement?                                                                                              |                      |
| Participant knowledge of the interviewer       | 7        | What did the participants know about the researcher? e.g. personal goals, reasons for doing the research                                                 |                      |
| Interviewer characteristics                    | 8        | What characteristics were reported about the interviewer/facilitator? e.g. Bias, assumptions, reasons and interests in the research topic                |                      |
| <b>Domain 2: Study design</b>                  |          |                                                                                                                                                          |                      |
| <i>Theoretical framework</i>                   |          |                                                                                                                                                          |                      |
| Methodological orientation and Theory          | 9        | What methodological orientation was stated to underpin the study? e.g. grounded theory, discourse analysis, ethnography, phenomenology, content analysis |                      |
| <i>Participant selection</i>                   |          |                                                                                                                                                          |                      |
| Sampling                                       | 10       | How were participants selected? e.g. purposive, convenience, consecutive, snowball                                                                       |                      |
| Method of approach                             | 11       | How were participants approached? e.g. face-to-face, telephone, mail, email                                                                              |                      |
| Sample size                                    | 12       | How many participants were in the study?                                                                                                                 |                      |
| Non-participation                              | 13       | How many people refused to participate or dropped out? Reasons?                                                                                          |                      |
| <i>Setting</i>                                 |          |                                                                                                                                                          |                      |
| Setting of data collection                     | 14       | Where was the data collected? e.g. home, clinic, workplace                                                                                               |                      |
| Presence of non-participants                   | 15       | Was anyone else present besides the participants and researchers?                                                                                        |                      |
| Description of sample                          | 16       | What are the important characteristics of the sample? e.g. demographic data, date                                                                        |                      |
| <i>Data collection</i>                         |          |                                                                                                                                                          |                      |
| Interview guide                                | 17       | Were questions, prompts, guides provided by the authors? Was it pilot tested?                                                                            |                      |
| Repeat interviews                              | 18       | Were repeat interviews carried out? If yes, how many?                                                                                                    |                      |
| Audio/visual recording                         | 19       | Did the research use audio or visual recording to collect the data?                                                                                      |                      |
| Field notes                                    | 20       | Were field notes made during and/or after the interview or focus group?                                                                                  |                      |
| Duration                                       | 21       | What was the duration of the interviews or focus group?                                                                                                  |                      |
| Data saturation                                | 22       | Was data saturation discussed?                                                                                                                           |                      |
| Transcripts returned                           | 23       | Were transcripts returned to participants for comment and/or                                                                                             |                      |

| Topic                                  | Item No. | Guide Questions/Description                                                                                                        | Reported on Page No. |
|----------------------------------------|----------|------------------------------------------------------------------------------------------------------------------------------------|----------------------|
|                                        |          | correction?                                                                                                                        |                      |
| <b>Domain 3: analysis and findings</b> |          |                                                                                                                                    |                      |
| <i>Data analysis</i>                   |          |                                                                                                                                    |                      |
| Number of data coders                  | 24       | How many data coders coded the data?                                                                                               |                      |
| Description of the coding tree         | 25       | Did authors provide a description of the coding tree?                                                                              |                      |
| Derivation of themes                   | 26       | Were themes identified in advance or derived from the data?                                                                        |                      |
| Software                               | 27       | What software, if applicable, was used to manage the data?                                                                         |                      |
| Participant checking                   | 28       | Did participants provide feedback on the findings?                                                                                 |                      |
| <i>Reporting</i>                       |          |                                                                                                                                    |                      |
| Quotations presented                   | 29       | Were participant quotations presented to illustrate the themes/findings?<br>Was each quotation identified? e.g. participant number |                      |
| Data and findings consistent           | 30       | Was there consistency between the data presented and the findings?                                                                 |                      |
| Clarity of major themes                | 31       | Were major themes clearly presented in the findings?                                                                               |                      |
| Clarity of minor themes                | 32       | Is there a description of diverse cases or discussion of minor themes?                                                             |                      |

Developed from: Tong A, Sainsbury P, Craig J. Consolidated criteria for reporting qualitative research (COREQ): a 32-item checklist for interviews and focus groups. *International Journal for Quality in Health Care*. 2007. Volume 19, Number 6: pp. 349 – 357

**Once you have completed this checklist, please save a copy and upload it as part of your submission. DO NOT include this checklist as part of the main manuscript document. It must be uploaded as a separate file.**

1  
2  
3 *Interview Guide*  
4  
5

|                                                                                     |
|-------------------------------------------------------------------------------------|
| 6 Interview Guide                                                                   |
| 7                                                                                   |
| 8 1. Tell me about your experience of social media.                                 |
| 9                                                                                   |
| 10 2. Do you share personal information online such as pictures, location and       |
| 11 employment status? If yes/no, why?                                               |
| 12                                                                                  |
| 13 3. Do you use social media for personal or professional use?                     |
| 14                                                                                  |
| 15 4. What do you feel are the benefits of using social media apps?                 |
| 16                                                                                  |
| 17 5. What do you feel are the risks associated with the use of social media?       |
| 18                                                                                  |
| 19 6. As a clinician/ future clinician how would you feel about patients contacting |
| 20 you/following you on social media?                                               |
| 21                                                                                  |
| 22                                                                                  |

23  
24  
25  
26  
27 *Vignettes*  
28  
29

|                                                                                            |
|--------------------------------------------------------------------------------------------|
| 30 Follow up interviews: Vignettes                                                         |
| 31                                                                                         |
| 32                                                                                         |
| 33 1. “Michelle Kelly is a student nurse. She recently posted a photo to twitter showing   |
| 34 the Accident and Emergency room of the hospital in which she is training on a           |
| 35 Saturday night. The caption for the photograph was “The crazies are really out          |
| 36 tonight...”. There were several patients in the photograph, although only one is        |
| 37 readily identifiable. You see from her feed that she is “friends” with a number of      |
| 38 former patients on facebook. In a series of posts with one former patient, John, they   |
| 39 discuss the upsetting nature of the injuries received by an unidentified patient, with  |
| 40 whom John shared a room”.                                                               |
| 41                                                                                         |
| 42                                                                                         |
| 43                                                                                         |
| 44                                                                                         |
| 45                                                                                         |
| 46                                                                                         |
| 47                                                                                         |
| 48                                                                                         |
| 49                                                                                         |
| 50                                                                                         |
| 51                                                                                         |
| 52                                                                                         |
| 53                                                                                         |
| 54                                                                                         |
| 55 2. “As a senior house officer in a busy surgical outpatients clinic, you consult with a |
| 56 young lady who is on the laparoscopy waiting list. She appears disconcerted and         |
| 57 tells you about a recent you tube video link that was shared with her by a friend.      |
| 58                                                                                         |
| 59                                                                                         |
| 60                                                                                         |

1  
2  
3  
4  
5  
6  
7  
8  
9  
10  
11  
12  
13  
14  
15  
16  
17  
18  
19  
20  
21  
22  
23  
24  
25  
26  
27  
28  
29  
30  
31  
32  
33  
34  
35  
36  
37  
38  
39  
40  
41  
42  
43  
44  
45  
46  
47  
48  
49  
50  
51  
52  
53  
54  
55  
56  
57  
58  
59  
60

The video involved a group of young men who appeared drunk and were taking turns jumping into a swimming pool after drinking a pint of alcohol. She recognised one of them as the surgical registrar who booked her for her upcoming laparoscopy. She has since found out that the others were also junior doctors in the hospital. She tells you that, although she has no problem with clinicians enjoying themselves, she would not be comfortable with such unprofessional type people having such involvement in her health”.

- How would you approach this problem with the patient?
- What ethical and professional issues arise here?

3. “While on placement in final year of physiotherapy, a friend sends you a screen shot of a blog that one of your classmates is running. The classmate is a very hard working student and has always shared resources with you. The blog is a day by day account of your classmate’s clinical encounters, highlighting learning points and tips for the final year examination. The screenshot is of a paragraph outlining in detail the history of a road traffic accident that led to a client presenting to her. The client’s name is not given but the gender, age, locality and date of accident is documented. The screenshot is followed by this comment from your friend: “no prizes for guessing who this guy is!”

- Would you act on this information? If so, how?
- What ethical and legal dilemmas arise while sharing experiences online?



# BMJ Open

**“Doctors can’t be doctors all of the time”: a qualitative study of how general practitioners and medical students negotiate public- professional and private-personal realms using social media**

|                                 |                                                                                                                                                                                                                                                                                                                                                                                                                                                                                                                                                                                                                                                                                                                                                         |
|---------------------------------|---------------------------------------------------------------------------------------------------------------------------------------------------------------------------------------------------------------------------------------------------------------------------------------------------------------------------------------------------------------------------------------------------------------------------------------------------------------------------------------------------------------------------------------------------------------------------------------------------------------------------------------------------------------------------------------------------------------------------------------------------------|
| Journal:                        | <i>BMJ Open</i>                                                                                                                                                                                                                                                                                                                                                                                                                                                                                                                                                                                                                                                                                                                                         |
| Manuscript ID                   | bmjopen-2020-047991.R2                                                                                                                                                                                                                                                                                                                                                                                                                                                                                                                                                                                                                                                                                                                                  |
| Article Type:                   | Original research                                                                                                                                                                                                                                                                                                                                                                                                                                                                                                                                                                                                                                                                                                                                       |
| Date Submitted by the Author:   | 27-Sep-2021                                                                                                                                                                                                                                                                                                                                                                                                                                                                                                                                                                                                                                                                                                                                             |
| Complete List of Authors:       | <p>Marshal, Megan; Health Research Institute, University of Limerick School of Medicine<br/> Niranjan, Vikram; Health Research Institute, University of Limerick School of Medicine<br/> Spain, Eimear; Health Research Institute, University of Limerick School of Medicine<br/> MacDonagh, Joe; Technical University Dublin, School of Business and Humanities<br/> O'Doherty, Jane; Health Research Institute, University of Limerick School of Medicine<br/> O'Connor, Raymond; Health Research Institute, University of Limerick School of Medicine, Graduate Entry Medical School<br/> O'Regan, Andrew; University of Limerick Faculty of Education and Health Sciences, Health Research Institute, University of Limerick School of Medicine</p> |
| <b>Primary Subject Heading</b>: | Medical education and training                                                                                                                                                                                                                                                                                                                                                                                                                                                                                                                                                                                                                                                                                                                          |
| Secondary Subject Heading:      | Ethics                                                                                                                                                                                                                                                                                                                                                                                                                                                                                                                                                                                                                                                                                                                                                  |
| Keywords:                       | PRIMARY CARE, MEDICAL EDUCATION & TRAINING, MEDICAL ETHICS                                                                                                                                                                                                                                                                                                                                                                                                                                                                                                                                                                                                                                                                                              |
|                                 |                                                                                                                                                                                                                                                                                                                                                                                                                                                                                                                                                                                                                                                                                                                                                         |

SCHOLARONE™  
Manuscripts



I, the Submitting Author has the right to grant and does grant on behalf of all authors of the Work (as defined in the below author licence), an exclusive licence and/or a non-exclusive licence for contributions from authors who are: i) UK Crown employees; ii) where BMJ has agreed a CC-BY licence shall apply, and/or iii) in accordance with the terms applicable for US Federal Government officers or employees acting as part of their official duties; on a worldwide, perpetual, irrevocable, royalty-free basis to BMJ Publishing Group Ltd ("BMJ") its licensees and where the relevant Journal is co-owned by BMJ to the co-owners of the Journal, to publish the Work in this journal and any other BMJ products and to exploit all rights, as set out in our [licence](#).

The Submitting Author accepts and understands that any supply made under these terms is made by BMJ to the Submitting Author unless you are acting as an employee on behalf of your employer or a postgraduate student of an affiliated institution which is paying any applicable article publishing charge ("APC") for Open Access articles. Where the Submitting Author wishes to make the Work available on an Open Access basis (and intends to pay the relevant APC), the terms of reuse of such Open Access shall be governed by a Creative Commons licence – details of these licences and which [Creative Commons](#) licence will apply to this Work are set out in our licence referred to above.

Other than as permitted in any relevant BMJ Author's Self Archiving Policies, I confirm this Work has not been accepted for publication elsewhere, is not being considered for publication elsewhere and does not duplicate material already published. I confirm all authors consent to publication of this Work and authorise the granting of this licence.

1  
2  
3 **Title page**  
4  
5  
6  
7  
8

9 **“Doctors can’t be doctors all of the time”: a qualitative study of how general practitioners and**  
10 **medical students negotiate public- professional and private-personal realms using social media**  
11  
12

13  
14 M Marshal<sup>1</sup>, V Niranjana<sup>2</sup>, E Spain<sup>1</sup>, J MacDonagh<sup>3</sup>, J O’Doherty<sup>1</sup>, R O’Connor<sup>1</sup>, \*A O’Regan<sup>1</sup>  
15  
16

17  
18  
19  
20 \*corresponding author Dr Andrew O’Regan, address: School of Medicine, University of Limerick, Limerick, Ireland; email- [andrew.oregan@ul.ie](mailto:andrew.oregan@ul.ie)  
21  
22

23 <sup>1</sup>Health Research Institute University of Limerick School of Medicine, Limerick, Ireland  
24

25 <sup>2</sup>School of Public Health Physiotherapy and Sports Science, University College Dublin, Dublin, Ireland  
26  
27

28 <sup>3</sup>School of Business & Humanities, Technological University Dublin, Ireland  
29  
30  
31  
32  
33

34 Key words – General Practice, Social media, online professionalism, medical education  
35  
36

37 Manuscript word count – 5071  
38  
39  
40  
41  
42

43 **Abstract**  
44

45 **Objective-** The objective of this study is to explore the experiences and perspectives of general  
46 practitioners’ and medical students’ use of, and behaviour on, social media and to understand how  
47 they negotiate threats to professional and personal life on social media.  
48  
49

50  
51  
52 **Design-** A two phase qualitative design was employed, consisting of semi-structured interviews and  
53 follow-up vignettes, where participants were asked to respond to vignettes that involved varying  
54 degrees of unprofessional behaviour. Data were analysed using template analysis.  
55  
56  
57  
58  
59  
60

1  
2  
3 **Setting and Participants-** Participants were general practitioner tutors and third year medical students  
4 who had just completed placement on the University of Limerick longitudinal integrated clerkship.  
5  
6  
7 Five students and three general practitioners affiliated with the medical school were invited to  
8  
9 participate in one-to-one interviews.  
10

11  
12 **Results** – three overarching themes, each containing subthemes were reported. ‘Staying in contact  
13 and up to date’ outlines how social media platforms provide useful resources and illustrates the  
14 potential risks of social media. ‘Online persona’ considers how social media have contributed to  
15 changing the nature of inter-personal relationships. ‘Towards standards and safety’ raises the matter  
16 of how to protect patients, doctors and the medical profession.  
17  
18  
19  
20  
21  
22

23  
24 **Conclusion** - Guidance is required for students and medical practitioners on how to establish  
25 reasonable boundaries between their personal and professional presence on social media and in their  
26 private life so that poorly judged use of social media does not negatively affect career prospects and  
27 professional efficacy.  
28  
29  
30  
31  
32  
33  
34  
35  
36  
37  
38  
39

#### 40 **Strengths and Weaknesses of the Study**

- 41
- 42
- 43 • The sampling method facilitated balance of gender, age and nationality of participants.
- 44
- 45
- 46 • The conceptual lens, communities of learning, situated the data in terms of accepted theory  
47 and evidence.
- 48
- 49
- 50
- 51 • The use of vignettes provided rich data on participants’ experience of social media use and  
52 behaviour.
- 53
- 54
- 55
- 56 • The study was limited to one cohort of participants in a single medical school.
- 57
- 58
- 59 • The number of participants was relatively small (N=8).
- 60

## Introduction

Social media is defined as “a group of internet-based applications that build on the ideological and technological foundations of Web 2.0, and that allow the creation and exchange of user generated content” [1]. It has become an effective communication tool for public health to convey information to populations in ‘real-time’ during the COVID-19 pandemic [2]. While social media can improve communication in some instances, the associated environment is fraught with the danger of suboptimal communication [3]. A comprehensive review warned that, for health professionals and patients, social media can negatively impact on mental health, privacy and information quality [4]. The concept of ‘online professionalism’, rooted in the traditional values of medicine, has evolved in the past decade in response to the challenges of the constantly changing social media sphere [5].

Unprofessional online behaviour resulting in disciplinary action for medical students and doctors is concerning [6]; one international study reported that almost one fifth of the medical students surveyed admitted to sharing clinical images inappropriately [7]. Similarly, surveys of medical students in Australia [8], England [9] and the USA [10] reported that unprofessional social media posting was common. While regulatory guidelines are available, inappropriate behaviour on social media remains problematic [11], with the majority of residents in one study admitting to having posted inappropriate photographs of medical colleagues intoxicated on social media [12]. In this context, the findings of cross-sectional survey of the public are relevant; it reported that inappropriate use of social media by physicians, including images of intoxication, would cause patients to trust them less [13]. Such implications have been highlighted by medical ethicists [14]. The phenomenon is not restricted to doctors – over half of respondents in a survey of registered nurses said that they had witnessed inappropriate online behaviour among colleagues [15]. Furthermore, postgraduate programme directors frequently check the social media profiles of residency applicants for inappropriate behaviour [16].

1  
2  
3 Recent research surveys of medical students, residents and consultants, reported that almost one  
4  
5 third of students had posted inappropriate photographs of themselves on social media; the findings  
6  
7 among residents and consultants were significantly lower [17]. This raises the question of whether  
8  
9 there is an effect for age in the use of social media; a systematic review examining the impact of  
10  
11 social media on medical professionals encouraged intergenerational dialogue [18].  
12  
13

14  
15 Physicians and students may be unsure of the full medical, professional, and personal reputational  
16  
17 consequences of the new social media age [19, 20]. Ethical concerns also include the public-  
18  
19 professional and private-personal spheres. Few qualitative studies examining the views of medical  
20  
21 students and those of their clinical supervisors on this topic exist. The aim of this study was to  
22  
23 explore general practitioners' (GPs) and medical students' perspectives on and experience of social  
24  
25 media. Specific objectives were to investigate how students and their GP-tutors utilise social media;  
26  
27 what challenges they encounter in keeping boundaries between professional and personal identities  
28  
29 and private and public realms; how they negotiate these challenges and conduct themselves  
30  
31 professionally when using online platforms.  
32  
33

### 34 35 36 **Conceptual framework**

37  
38 'Communities of practice' is a popular theory for conceptualising the development of medical  
39  
40 professional identity [21], whereby the medical profession is understood both as a "collegial  
41  
42 profession and community of practice" [21]. The theory states that successful identity formation  
43  
44 depends on a dynamic interplay between members of the medical community at different stages of  
45  
46 the medical continuum. To this end social media can supplement but not replace "meaningful contact  
47  
48 with members of the community", which is considered in this framework to be the most important  
49  
50 factor in professional identity formation [21].  
51  
52  
53

54  
55 A qualitative epistemic approach leads to a methodology which teases out the subjective experience  
56  
57 of a research participant, and that is why interviews and responding to short vignettes were selected  
58  
59 for this study. Given we are not trying to make an invariant real word truth claim, such as with large  
60

1  
2  
3 sample size quantitative studies, we chose a conceptual-methodological approach that investigated  
4  
5 the depth and breadth of how medical doctors and students experience social media in their  
6  
7 personal and professional lives. Thus, the theoretical contribution of our paper is to say that social  
8  
9 media is not merely a communication tool but is a fluid medium in which people posit varying  
10  
11 identities and often negotiate these with themselves, their colleagues, patients and with those in the  
12  
13 social media sphere, and that it is particularly difficult for doctors as they expect so much from  
14  
15 themselves and have so much expected from them by others.  
16  
17

## 18 19 **Methodology**

### 20 21 **Study design**

22  
23  
24  
25 The study adhered to the COREQ [Consolidated criteria for reporting qualitative research] principles  
26  
27 for reporting qualitative research (supplementary material 1) [22]. Ethical approval was granted by  
28  
29 the University of Limerick Education and Health Science Faculty Ethics Committee [2017\_05\_17\_EHS].  
30  
31 Participants were contacted by email sent from a research administrator who was not involved in  
32  
33 course teaching and assessment, thus ensuring no power dynamic or coercion. This study utilised a  
34  
35 hybrid methodology whereby an in-depth, semi-structured interview based on a topic guide designed  
36  
37 by the research team was followed, for some participants, by a second interview structured using  
38  
39 short ethical dilemmas on social media described here as vignettes.  
40  
41  
42  
43

### 44 45 **Setting and Participants**

46  
47 Participants were GP tutors and third year medical students who had just completed a longitudinal  
48  
49 integrated clerkship [23]. Five medical students and three GPs participated in the study. Purposive,  
50  
51 non-probabilistic, sampling was used to ensure that a balance was achieved between students from  
52  
53 Europe and North America and that both male and females were selected to be as representative as  
54  
55 possible of the student population. The characteristics of the participants are outlined in table 1. As  
56  
57 judgemental sampling involves the judgement of the researchers based, for example, on their  
58  
59  
60

1  
2  
3 expertise and knowledge of previous research it was decided to base the sample size on a previous  
4 qualitative study on medical student mobile phone usage [24]. The interview process worked through  
5 the eight participants until no new themes were emerging. This is known as data saturation- the  
6 'stopping criterion' [25] for the data collection being met as those being interviewed are repeating  
7 themes mentioned by others or are not suggesting new themes.  
8  
9

10 {Insert table 1 here}

### 11 **Public and patient involvement**

12 No patients were involved in the study, but the research question was derived from classroom  
13 discussions and interactions with medical students GP-tutors.  
14

### 15 **Data Collection**

16 The interview guide was developed by an interdisciplinary team, and vignettes were developed by two  
17 of the research team (ES, AOR) with the purpose of exploring students' and clinicians' responses to  
18 examples of unprofessional behaviour online by healthcare workers (supplementary material 2).  
19 These vignettes were designed so that doctors and medical students could give ethical and  
20 professional perspectives not simply on themselves but also on those with whom they work and will  
21 be working in their medical careers. Participants were asked to respond to three separate scenarios  
22 which required them to consider the ethical dilemmas and professional practice challenges of using  
23 social media personally and professionally. Where the themes explored in the vignettes were  
24 addressed by the participants in their initial interview they were not interviewed again with the aid of  
25 the vignettes.  
26

27 Interviews were conducted by a trained female researcher (MM), who would have known some of the  
28 participants and lasted between 15 and 30 minutes. These were conducted either by telephone, Skype  
29 or in person and were digitally recorded, with the explicit consent of those participating. Where  
30 participants were invited to a second interview, if their first interview had not addressed the themes  
31  
32  
33  
34  
35  
36  
37  
38  
39  
40  
41  
42  
43  
44  
45  
46  
47  
48  
49  
50  
51  
52  
53  
54  
55  
56  
57  
58  
59  
60



1  
2  
3 in the vignettes, they were shown or read short vignettes about use of social media and their opinions  
4  
5 were elicited.  
6  
7

### 8 **Data analysis** 9

10  
11 The methodology utilised was template analysis. A coding template based on representative parts of  
12  
13 the data is developed, and, subsequently, is revised and refined [26]. It facilitates the use of a priori  
14  
15 themes which can later be modified or excluded as the data analysis evolves, as the researchers read  
16  
17 and re-read the data. The identification of templates is thus iterative in nature - some are established  
18  
19 initially as more important and then, after thorough reading and re-reading of the data transcripts,  
20  
21 may be seen as less important or more important. This helps to compare perspectives between  
22  
23 different categories of participant, in this case, GPs and medical students. It is a practical method that  
24  
25 is well suited to a team involving multiple coders as it gives the freedom to the team to collaborate on  
26  
27 the direction and content of the coding. The process involved over six meetings of the coders (AOR,  
28  
29 VN, JOD).  
30  
31  
32

33  
34 Initially, the coders read the full interview texts to familiarise themselves with the raw data.  
35  
36 Preliminary data coding was conducted independently with the use of a priori themes that the  
37  
38 researchers expected to appear in the data; only a priori themes related to the research question were  
39  
40 chosen. These included benefits of social media, personal and professional use, and potential pitfalls.  
41  
42 The initial codes and themes were used to define a coding template; this facilitated the researchers  
43  
44 to understand the relationship between the codes and themes, whilst maintaining flexibility so that  
45  
46 more codes and themes could be added as the hierarchical analysis developed. Coders discussed  
47  
48 personal experiences with social media and attitudes towards the scenarios in the vignettes, a process  
49  
50 known as “active-acknowledgement” for overcoming researcher bias [27]. Discrepancies were  
51  
52 resolved by personal reflection and ongoing dialogue between the data analysis team.  
53  
54  
55  
56  
57  
58  
59  
60

## Findings

The analysis produced three overarching themes, each with subthemes that were often interconnected and, in some cases, had overlapping ideas.

### 1. Staying in contact and up to date

This theme refers to the practical, day-to-day applications of social media for medical students and GPs. Social media has undoubted social and networking benefits, and these were highlighted by participants, as well as the challenging nature of the information available- which can help participants stay up to date, but which can waste time also. This theme has been divided into two subthemes: 'staying connected' and 'educational tool'.

#### 1.1 Staying connected

Maintaining friendships and staying in touch with others was the primary stated use of social media platforms. One student said how helpful Facebook was in keeping touch with family throughout the world and with a network of friends from a previous course, while another felt that the speed and ease of access may come at the cost of maintaining meaningful relationships.

*"perhaps they are superficial relationships, but you know I feel like if I didn't have 'Facebook', particularly I would absolutely lose contact with these people." [student, male]*

Social media was perceived as very useful for staying in touch, but there appeared to be an awareness of the link between social media abuse when interviewing for jobs or being publicly castigated for holding the 'wrong' view on a contentious topic.

*"I am very conscious about putting up things like my date of birth, things about politics... of not giving away too much about myself." [student, female]*

In this quote there is both the appreciation of confidential personal details such as "date of birth" but also the sense that there are areas which are personal and private, such as political views. This raised

1  
2  
3 the idea that students and GPs alike were aware of the importance of boundary setting and so social  
4  
5 media must be approached carefully.  
6  
7  
8  
9

## 10 11 **1.2 'Educational tool'**

12  
13  
14 This subtheme describes how, on one hand, social media platforms have significantly enhanced  
15  
16 learning but, on the other, must be handled with care. Concerns about social media distracting from  
17  
18 learning were evident for GPs and students:  
19

20  
21 *"you can spend hours and hours just scrolling going from Twitter to Facebook to LinkedIn."* [general  
22  
23 practitioner, male]  
24

25  
26 *"99% of the time it is just for killing time."* [student, male]  
27  
28

29  
30 Some medical experts post clinical pictures and scenarios and invite students to suggest differential  
31  
32 diagnoses, often giving the correct answer and an explanation at a later point. While this was  
33  
34 appreciated by one student in the interview, in the follow-up vignette discussion he then questioned  
35  
36 the professional ethics of posting patient information in a publicly accessible forum, and the concepts  
37  
38 of consent and confidentiality were raised. When asked about professional concerns relating to one  
39  
40 vignette (on online sharing of clinical educational material) all participants acknowledged the  
41  
42 importance of confidentiality.  
43  
44

45  
46 *"I think you need to be careful about what you post. Personally, for myself, as a rule of thumb, I don't*  
47  
48 *think you should post anything about clinical... a clinical scenario or anything because that could get*  
49  
50 *you into trouble."* [student, female]  
51  
52

53  
54 Most noticeable in this last statement is the tension between a very useful medical pedagogical tool,  
55  
56 which may benefit medical students, and the ethicality of referring to identifiable patient case studies.  
57  
58  
59  
60

## 2. Online persona

This theme analyses the process whereby learners at all stages of the medical continuum negotiate an online image and attempt to balance personal and professional dimensions. There are three subthemes: 'crafting an image', 'societal expectations' and 'boundaries are blurring'.

### 2.1 Crafting an image

Participants agreed that care had to be taken with how medical students/clinicians present themselves online. Students and GPs were aware that various platforms serve very different purposes. Both groups indicated a degree of embarrassment with self-promotion on social media. All participants were conscious of how they would be perceived by the public. Several felt it was important to be selective with what gets posted to craft a positive image:

*"you can hold an image of yourself... put up the photos where you look good are having a wonderful time.... I suppose also, some people open their hearts a bit too much... it probably doesn't cast them in the best light even if that is not their intention." [student, male]*

Another student explained this concept further, detailing how he restricted what he posted to paint an almost superhuman version of himself.

*"the image you are trying to maintain could be what you identify with or what you want to identify with, but you are not really that, so kind of detachment is potentially harmful particularly with young people.... There is a culture of social media that is centred around vanity and around what you want to identify with versus what you actually identify with." [student, male]*

This quote strongly points to the tensions and pressures in emotional self-regulation involved in using such impression management strategies. It also highlights the danger, when using social media, of a cognitive dissonance between the image medical students and doctors wish to project and the extent to which this image accurately reflects who they are.

## 2.2 Societal expectations

This theme considers how participants think society might view them when using social media. An experienced GP participant felt strongly that society expects something more from medical students compared to other students as they are “future doctors”. This question as to whether society should expect a higher standard for doctors permeated most of the interviews.

*“maybe somebody looking on would say... ‘I don’t care if my plumber has 20 pints at the weekend... or I see them on ‘Facebook’ running... with no clothes on’ – but I don’t want to see a GP on Monday morning who has been doing that.” [general practitioner, male]*

The fear of reputation damage was balanced with the realisation that we cannot all be perfect all the time. One student described this succinctly but still advised the utmost caution when using social media:

*“We are only human. I mean, God forbid, Watson and Crick who discovered DNA, I am sure they were mad for their lush [alcohol] every once in a while, but who cares?” [student, male]*

Other students took an opposing view and expressed in both interview and follow-up vignette the need to maintain professional conduct on and off duty.

*“They have a reputation to maintain and here they are not representing themselves in a professional manner.” [student, male]*

In some instances, there was dissonance between the view expressed by a participant in the interview and that of the same participant in the follow-up vignettes. One student, when asked about societal expectations, cited the example of a picture shared on a social media platform of a doctor smoking a cigarette, saying that it made no sense for that doctor then to be telling patients not to smoke. When asked to comment on the vignette where a patient expressed concern about doctors who were

1  
2  
3 potentially going to operate on her and had appeared drunk on a social media platform, she  
4  
5 responded:

6  
7  
8 *"I would tell her that doctors can't be doctors all of the time" [student, female]*  
9

10  
11 A very striking example of this is the extent to which doctors are now having to demarcate their public  
12  
13 and private life is the remark from one GP about how they had been told to circumvent their social  
14  
15 media behaviour at a wedding:

16  
17  
18 *"I suppose you can try to make it as private as you can, but I don't know if people entirely understand*  
19  
20 *the rules of it, you know when pictures go up I don't think you're even able to take them down or that*  
21  
22 *kind of thing. I think people are kind of wary of that you know when pictures are being taken on a night*  
23  
24 *out or something you know people might say "don't put them on Facebook". I was at a wedding*  
25  
26 *recently of a doctor and there was a request on the invite not to put any pictures up on social media."*  
27  
28  
29 *(general practitioner, female)*  
30  
31

32  
33 Aside from doctors not being allowed to have a personal life or having to be aware that parts of it may  
34  
35 be captured inadvertently on social media such that they must take steps to prevent this, there is also  
36  
37 the sense that the rules for social media usage are evolving but that this GP and others are not clear  
38  
39 what those rules are and who is deciding upon them.  
40  
41  
42  
43  
44

### 45 **2.3 Boundaries are blurring**

46  
47

48  
49 This subtheme refers to the changing dynamic between doctors and patients to which social media is  
50  
51 contributing. GP participants agreed that it was not unusual to have friends who might be taken on  
52  
53 as patients or to have social interaction in the community with existing patients. However, the  
54  
55 introduction of social media has the potential to destroy privacy and to blur the boundary between  
56  
57 personal and professional.  
58  
59  
60

1  
2  
3 Friend requests on 'Facebook' were cited by many students and GPs as a potential source of  
4  
5 compromise with all viewing it as an inappropriate relationship, fraught with possibilities of doctors'  
6  
7 personal information being inappropriately viewed as well as the potential for medical advice being  
8  
9 requested online. The risk to patient safety brought about by casual contact and giving of advice in a  
10  
11 non-clinical and more relaxed social media environment was pointed out. One GP emphasised  
12  
13 maintaining a division between personal and professional life:  
14  
15

16  
17 *"It is about keeping things separate. Your personal life and your professional life."* [general  
18  
19 practitioner, male]  
20

21  
22 This points, once again, to the need for individual doctors to decide where they are going to draw their  
23  
24 boundary lines with their patients online. Many participants talked about withdrawing from social  
25  
26 media interaction or making it difficult for the public to find them. Given that we are all fallible one  
27  
28 GP highlighted the need for doctors to be careful about how they use social media:  
29  
30

31  
32 *"I would try and avoid it. I think the importance of being a good doctor is to limit yourself. So, for  
33  
34 example you would, you can't be good 24-7. You can't be empathic 24-7. We are all human, we have  
35  
36 moods, we say the wrong thing, we do the wrong thing. I can only imagine someone Facebook  
37  
38 messaging me that they have a bit of indigestion or a bit of headache or something along those lines  
39  
40 and me not responding or me responding in an off-handed way in a less than professional manner and  
41  
42 then the inevitable happens, they have pneumonia, they have meningitis, they have cardiac issues or  
43  
44 something and of course they have contacted me and I have contacted them and it has been  
45  
46 unprofessional and that means that I am partly responsible for what happened. So, I am very wary of  
47  
48 patients using social media to contact me"* (general practitioner, male)  
49  
50  
51

52  
53 This ties into the final theme of what exactly is proper use of social media by doctors.  
54  
55  
56  
57  
58  
59  
60

### 3 Towards standards and safety

This final theme illustrates the current uncertainty regarding what it means to be a medical professional on social media. There are two subthemes – ‘clarifying the standard’ and ‘safe navigation’.

#### 3.1 Clarifying the standard

While the data shows that there is awareness among all participants of some ethical dimensions and legal ramifications of poor conduct on social media, there was no clear consensus on what is acceptable. One GP, while aware of the limitations of his own experience with social media, expressed concern for medical students:

*“people who have spent all their waking hours for the last ten years stuck in a room swotting, most of them don’t have life experience and are not worldly-wise and therefore are very innocent... they are just not aware of the huge implications this can have on their future so I think that needs to be spelled out very clearly and explicitly.” [general practitioner, male]*

GPs and students appeared to disagree on whether clinical experiences could be shared online for teaching and reflective purposes. The vignettes magnified this uncertainty and were useful in presenting examples of where such social media dilemmas might occur. Most of the GPs believed that there was insufficient guidance provided for them and for students. They agreed that a clear set of guidelines was necessary that would uphold good professional conduct while protecting individuals who, in their leisure time, were trying to unwind:

*“It is a stressful enough job. You would hate to think that people would be told that you can never let your hair down, you can never do this or that. I think there has to be a balance somewhere.” [general practitioner, female]*



1  
2  
3 This quote underlines the imperative of educating future and current physicians in the use of social  
4 media to achieve a private social life.  
5  
6  
7  
8  
9

### 10 11 **3.2 Safe Navigation** 12

13  
14 This final subtheme connects the perceptions found throughout the data on how students and GPs  
15 might successfully and safely navigate social media platforms, accessing education and connecting  
16 with others, while at the same time keeping themselves plus their current and future patients safe.  
17  
18 GPs were very clear on what type of information should not be divulged on social media platforms:  
19  
20  
21  
22

23  
24 *“Any info. that you think could harm you, your family or your patients.” [ general practitioner, female]*  
25

26  
27 The follow-up vignettes revealed that for three of the students, there was a high level of awareness  
28 of risks with sharing information online. They recognised the potential for litigation and damaged  
29 career opportunities as consequences of inappropriate use of social media platforms. However, a  
30 fourth student, did not appear to have this level of awareness and was actively engaging in  
31 broadcasting her own clinical experiences seemingly without awareness of the dangers:  
32  
33  
34  
35  
36

37  
38 *“I have a [You Tube] channel that I just started, and I am just uploading some videos about my life...  
39 about medicine”*  
40  
41

42  
43 *[Interviewer] Do you think there are any risks with that?*  
44

45  
46 *“no, not really.” [student, female]*  
47  
48

49  
50 There was no evidence among participants of any level of participation in formal education on  
51 engaging social media, and for most, awareness seemed to come from life experience. One student  
52 told how lessons learned about life as a younger girl influenced her behaviour on SMPs:  
53  
54  
55

56  
57 *“ My dad used to always give us lectures about pictures which I totally understand so I do have certain  
58 settings on ‘Facebook’ which only allows... not even all my friends to see my photos” [student, female]*  
59  
60

1  
2  
3 There was a notable lack of awareness of the existence of guidelines among both groups of  
4 participants. All agreed that, in general, social media can be positive thing, but most urged caution  
5 and showed awareness of risk.  
6  
7  
8  
9

10 *"I think overall, social media is great but just be careful with it. That is the long and the short of it."*

11  
12  
13 *[general practitioner, male]*  
14  
15  
16  
17  
18

## 19 Discussion

20  
21  
22 The analysis has provided new insights into the research question exploring GPs and medical students  
23 experience of and perspectives on social media use and behaviour. While educational and networking  
24 benefits to the profession exist, most expressed unease about boundary setting and staying safe on  
25 these platforms. GPs and medical students appeared to agree that there was a line between  
26 professional and personal realms that needed to be maintained, but for medical students, defining  
27 where that boundary lies was difficult to conclude.  
28  
29  
30  
31  
32  
33  
34  
35

36 The scenario that caused the most disagreement among participants related to a video of doctors  
37 behaving unprofessionally during their time off, with some defending them and others saying it was  
38 unacceptable to behave in a certain way at any time. The statement in our study that "doctors can't  
39 be doctors all of the time" is a dominant theme. An important point in our study is the discordance  
40 between what participants think and what they say, as illustrated by the follow up interview seeking  
41 their reactions to vignettes. Other research has reported similar inconsistencies, where respondents  
42 acknowledged that inappropriate social media use was common but were far more likely to  
43 interpret the behaviour as being inappropriate when it was reported among colleagues rather than  
44 themselves [17]. Establishing boundaries in a social media age is difficult for all citizens but  
45 especially for doctors as they expected to practise to the highest level. The quote regarding Crick and  
46 Watson was very apposite in this respect.  
47  
48  
49  
50  
51  
52  
53  
54  
55  
56  
57  
58  
59  
60

1  
2  
3 The theme of 'crafting an image' refers to the efforts of medical students and physicians to portray  
4 themselves favourably on social media. This phenomenon has been described as an online "identity  
5 crisis" for medical professionals [28]. Researchers have warned of the problem of conflating "self-  
6 expression, self-promotion and self-communication" [29]. Research with health care professionals on  
7 the subject of 'digital identity' formation identified the potential for conflict when professional,  
8 personal, public and private identities did not align [30]. The 'communities of practice' theory of  
9 identity formation addresses how personal and professional identities should be congruent. To this  
10 end, role-modelling, mentoring, experiential learning, reflection, and support from medical educators  
11 are important.  
12  
13  
14  
15  
16  
17  
18  
19  
20  
21  
22  
23

24 The concept of dual relationships, whereby professionals and the public interact formally at times  
25 and informally at other times is brought to a greater level of acuity by social media where 'context  
26 collapses'- a point emphasised in our data [31]. Formal education at medical school in digital  
27 professional identity formation in medical school curricula is thus important as is subsequent  
28 professional accreditation [32]. Some of the participants in our study were aware of which social  
29 media platforms to use for various purposes and how to use privacy settings to ensure safety.  
30  
31  
32  
33  
34  
35  
36

37 Scholars have called for systematic approaches to the instruction of e-professionalism so that it can  
38 be incorporated into existing curricula [33].  
39  
40  
41  
42

43 The generational difference between the two groups of participants - students and general  
44 practitioners, is another important consideration. The so-called 'generation Z' or millennials who have  
45 grown up with social media are thought to be more aware of its use for personal branding and career  
46 promotion [34]. This raises the matter of how these generations may have experienced social media  
47 differently and how it may be an important effect- the 'cohort effect' as it is known in research on  
48 depression, for example, where younger generations report greater incidence of depression [35].  
49 Without negating the cohort effect theory, the participants' responses on social media were striking  
50 in that they raised similar themes to the GPs, e.g. of the effect posting intemperate remarks or ill-  
51  
52  
53  
54  
55  
56  
57  
58  
59  
60

1  
2  
3 advised images would have on a medical practitioner's career. This suggests a 'trans-generational'  
4 appreciation of the gravitas associated with medical practice which may be affected by the increasing  
5 presence of social media in our personal and private lives.  
6  
7  
8

9  
10 Guidance from medical educators in the USA advised reflection on social media identity, and with  
11 who and how they will interact [36]. The seriousness of inappropriate social media use is recognised  
12 by training bodies [37], and early reports of pilot interventions designed to teach social media  
13 professionalism have met with success [38].  
14  
15  
16  
17  
18

### 19 20 **Strengths and weaknesses** 21

22  
23 The "two stage" nature of the study, involving in depth interviews followed up by a phone call  
24 soliciting views on hypothetical scenarios, was a particular strength as it allowed participants to  
25 reflect on their views. A useful cross-cultural element was the participation of GPs and medical  
26 students from Ireland and North America. The use of a theoretical framework facilitated  
27 understanding of the data in terms of prior knowledge and theory, while allowing flexibility to  
28 incorporate new themes. Limitations of the study were its location in a single medical school in  
29 Ireland and the small sample size. The results may not be transferrable to other countries and may  
30 not be reflective of younger medical students and older clinicians. The interviewer was known to  
31 most of the participants which, on one hand, may exaggerate the propensity of participants to give  
32 socially desirable answers in the context of behaviour – a phenomenon known as social desirability  
33 bias [39]; on the other, it may produce richer data due to the easy establishment of rapport and  
34 trust [40].  
35  
36  
37  
38  
39  
40  
41  
42  
43  
44  
45  
46  
47  
48  
49  
50  
51  
52  
53  
54  
55  
56

### 57 **Implications for further research and practice** 58 59 60

1  
2  
3 Research is warranted to identify how best to teach safe practices for engaging with social media.  
4  
5 Clear and dynamic guidelines for medical students and GPs are needed for ethical social media use in  
6  
7 the medical profession due to the rapidly changing speed and scope of social media.  
8  
9

10 We have outlined operational guidance based on the study findings for professional practice:  
11

- 12  
13 • Medical educators should support students to use social media as a means of engaging in  
14  
15 communities of practice with peers and senior colleagues.  
16
- 17  
18 • Existing medical curricula must incorporate social media policies and formal instruction on e-  
19  
20 professionalism.  
21
- 22  
23 • Educators should acknowledge the tensions between personal and professional identities.  
24
- 25  
26 • Specific guidance is needed for students on what is appropriate to post and where and with  
27  
28 whom it is appropriate to interact.  
29
- 30  
31 • We have identified a need for skills teaching on how identities are developed and the setting  
32  
33 of boundaries and this may extend beyond social media use.  
34  
35  
36  
37

## 38 **Conclusion**

39  
40 Students and GPs view social media as a positive resource for the medical profession. Guidance is  
41  
42 required for students and medical practitioners on how to establish reasonable boundaries between  
43  
44 their personal and professional presence on social media and in their right to a private life in which  
45  
46 ineffective use of social media does not negatively affect career prospects.  
47  
48  
49  
50  
51

## 52 **Acknowledgements**

53  
54  
55 The authors are grateful to the students who inspired and contributed to the study as well as the GP  
56  
57 tutors on the School of Medicine's ULEARN-GP network.  
58  
59  
60

**Contributors**

MM was involved in the study design, data collection and analysis and helped to write the first draft; VN was involved in the data analysis and write up, ES was involved in study design, oversight, analysis and write-up; JMD was involved in the data analysis and write up; ROC was involved in data analysis, write-up; JOD was involved in study design, data analysis and write-up; AOR was involved in all stages of the project. Each author contributed to all drafts of the paper and read and approved the final manuscript.

**Competing interests**

We have read and understood BMJ policy on declaration of interests and declare that we have no competing interests.

**Ethics approval** University of Limerick Department of Education and Health Sciences Research Ethics Committee; 2017\_05\_17\_EHS

**Provenance and peer review** Not commissioned; externally peer reviewed.

**Data sharing statement** No additional data are available.

**Funding** – funding for publication was provided by the University of Limerick

## References

1. Kaplan AM, Haenlein M. Users of the world, unite! The challenges and opportunities of Social Media. *Business horizons*. 2010 1;53(1):59-68.
2. McNeill A, Harris PR, Briggs P. Twitter influence on UK vaccination and antiviral uptake during the 2009 H1N1 pandemic. *Frontiers in public health*. 2016;4:26.
3. Ahani A, Nilashi M. Coronavirus outbreak and its impacts on global economy: the role of social network sites. *Journal of Soft Computing and Decision Support Systems*. 2020;7[2]:19-22.
4. Smailhodzic E, Hooijsma W, Boonstra A, Langley DJ. Social media use in healthcare: a systematic review of effects on patients and on their relationship with healthcare professionals. *BMC health services research*. 2016;16[1]:442.
4. Giustini D, Ali SM, Fraser M, Boulos MNK. Effective uses of social media in public health and medicine: a systematic review of systematic reviews. *Online Journal of Public Health Informatics*. 2018;10[2].
5. Kind T. Professional guidelines for social media use: a starting point. *AMA journal of ethics*. 2015;17[5]:441-7.
6. Chauhan B, George R, Coffin J. Social media and you: what every physician needs to know. *J Med Pract Manage*. 2012;28[3]:206-9.
7. O'Sullivan E, Cutts E, Kavikondala S, Salcedo A, D'Souza K, Hernandez-Torre M, et al. Social media in health science education: an international survey. *JMIR Medical Education*. 2017;3[1]:e1.

- 1
  - 2
  - 3
  - 4
  - 5
  - 6
  - 7
  - 8
  - 9
  - 10
  - 11
  - 12
  - 13
  - 14
  - 15
  - 16
  - 17
  - 18
  - 19
  - 20
  - 21
  - 22
  - 23
  - 24
  - 25
  - 26
  - 27
  - 28
  - 29
  - 30
  - 31
  - 32
  - 33
  - 34
  - 35
  - 36
  - 37
  - 38
  - 39
  - 40
  - 41
  - 42
  - 43
  - 44
  - 45
  - 46
  - 47
  - 48
  - 49
  - 50
  - 51
  - 52
  - 53
  - 54
  - 55
  - 56
  - 57
  - 58
  - 59
  - 60
8. Barlow CJ, Morrison S, Stephens HO, Jenkins E, Bailey MJ, Pilcher D. Unprofessional behaviour on social media by medical students. *Medical Journal of Australia*. 2015;203[11]:439-.
9. Garner J, O'Sullivan H. Facebook and the professional behaviours of undergraduate medical students. *The clinical teacher*. 2010;7[2]:112-5.
10. Kitsis EA, Milan FB, Cohen HW, Myers D, Herron P, McEvoy M, et al. Who's misbehaving? Perceptions of unprofessional social media use by medical students and faculty. *BMC medical education*. 2016;16[1]:1-7.
11. Diller D, Yarris LM. A descriptive analysis of the use of Twitter by emergency medicine residency programs. *Journal of graduate medical education*. 2018; 10(1):51-5.
12. Garg M, Pearson DA, Bond MC, Runyon M, Pillow MT, Hopson L, Cooney RR, Khadpe J, Nomura JT, Inboriboon PC. Survey of individual and institutional risk associated with the use of social media. *Western Journal of Emergency Medicine*. 2016; 17(3):344.
13. Fatollahi JJ, Colbert JA, Agarwal P, Lee JL, Lehmann EY, Yuan N, Lehmann LS, Chretien KC. The impact of physician social media behavior on patient trust. *AJOB empirical bioethics*. 2020; 2;11(2):77-82.
14. Snyder L. Online professionalism: social media, social contracts, trust, and medicine. *The Journal of clinical ethics*. 2011; 22(2):173-5.
15. Wang Z, Wang S, Zhang Y, Jiang X. Social media usage and online professionalism among registered nurses: a cross-sectional survey. *International journal of nursing studies*. 2019; 98:19-26.
16. Langenfeld SJ, Vargo DJ, Schenarts PJ. Balancing privacy and professionalism: a survey of general surgery program directors on social media and surgical education. *Journal of surgical education*. 2016 Nov 1;73(6):e28-32.
17. Pronk SA, Gorter SL, van Luijk SJ, Barnhoorn PC, Binkhorst B, van Mook WN. Perception of social media behaviour among medical students, residents and medical specialists. *Perspectives on Medical Education*. 2021; 7:1-7.



- 1  
2  
3 18. Mak-Van Der Vossen, M., Van Mook, W., Van Der Burgt, S., Kors, J., Ket, J. C., Croiset, G., &  
4  
5 Kusrkar, R. Descriptors for unprofessional behaviours of medical students: a systematic review and  
6  
7 categorisation. *BMC medical education*. 2017; 17[1], 164.  
8  
9  
10 19. Gholami-Kordkheili F, Wild V, Strech D. The impact of social media on medical professionalism:  
11  
12 a systematic qualitative review of challenges and opportunities. *Journal of medical Internet research*.  
13  
14 2013;15[8]:e184.  
15  
16 20. O'Regan A, Smithson WH, Spain E. Social media and professional identity: pitfalls and  
17  
18 potential. *Medical teacher*. 2018;40[2]:112-6.  
19  
20 21. Cruess SR, Cruess RL, Steinert Y. Supporting the development of a professional identity:  
21  
22 general principles. *Medical teacher*. 2019 Jun 3;41(6):641-9.  
23  
24 22. Tong A, Sainsbury P, Craig J. Consolidated criteria for reporting qualitative research[*COREQ*]:  
25  
26 a 32-item checklist for interviews and focus groups. *International journal for quality in health care*.  
27  
28 2007;19[6]:349-57.  
29  
30 31 23. O'Regan A, Hayes P, O'Connor R, Casey M, O'Dwyer P, Culhane A, et al. The University of  
32  
33 Limerick Education and Research Network for General Practice[*ULEARN-GP*]: practice characteristics  
34  
35 and general practitioner perspectives. *BMC family practice*. 2020;21[1]:1-11.  
36  
37 38 24. Rashid-Doubell F, Mohamed S, Elmusharaf K, O'Neill C. A balancing act: a phenomenological  
39  
40 exploration of medical students' experiences of using mobile devices in the clinical setting. *BMJ open*.  
41  
42 2016;6[5].  
43  
44 45 25. Francis JJ, Johnston M, Robertson C, Glidewell L, Entwistle V, Eccles MP, et al. What is an  
46  
47 adequate sample size? Operationalising data saturation for theory-based interview studies.  
48  
49 *Psychology and health*. 2010;25[10]:1229-45.  
50  
51 52 26. Brooks J, McCluskey S, Turley E, King N. The utility of template analysis in qualitative  
53  
54 psychology research. *Qualitative research in psychology*. 2015;12[2]:202-22.  
55  
56  
57  
58  
59  
60

- 1  
2  
3 27. Berger R. Now I see it, now I don't: Researcher's position and reflexivity in qualitative research.  
4 Qualitative research. 2015;15[2]:219-34.28. DeCamp M, Koenig TW, Chisolm MS. Social media  
5 and physicians' online identity crisis. Jama. 2013;310[6]:581-2.  
6  
7  
8  
9  
10 28. DeCamp M, Koenig TW, Chisolm MS. Social media and physicians' online identity crisis. Jama.  
11 2013;310[6]:581-2.  
12  
13  
14 29. Van Dijck J. 'You have one identity': performing the self on Facebook and LinkedIn. Media,  
15 culture & society. 2013;35[2]:199-215.  
16  
17  
18 30. Ruan B, Yilmaz Y, Lu D, Lee M, Chan TM. Defining the Digital Self: A Qualitative Study to Explore  
19 the Digital Component of Professional Identity in the Health Professions. Journal of medical Internet  
20 research. 2020;22(9):e21416.  
21  
22  
23  
24 31. Sugimoto C, Hank C, Bowman T, Pomerantz J. Friend or faculty: Social networking sites, dual  
25 relationships, and context collapse in higher education. First Monday. 2015.  
26  
27  
28 32. Jawed S, Mahboob U, Yasmeen R. Digital professional identity: Dear Internet! Who am I?  
29 Education for Health. 2019;32[1]:33.  
30  
31  
32  
33 33. Wissinger CL, Stiegler Z. Using the extended parallel process model to frame e-professionalism  
34 instruction in healthcare education. Teaching and learning in medicine. 2019 May 27;31(3):335-41.  
35  
36  
37  
38 34. Vițelar A. Like me: Generation Z and the use of social media for personal branding.  
39 Management Dynamics in the Knowledge Economy. 2019;7(2):257-68.  
40  
41  
42  
43 35. MacDonagh, J. (2016). Depression and anxiety. In P. Greasley & A. Torn, (Eds.). *Psychology for*  
44 *Nurses*. Cambridge: Polity.  
45  
46  
47 36. Kind T, Patel PD, Lie DA. Opting in to online professionalism: social media and pediatrics.  
48 Pediatrics. 2013 Nov 1;132(5):792-5.  
49  
50  
51  
52 37. Pillow MT, Hopson L, Bond M, Cabrera D, Patterson L, Pearson D, Sule H, Ankel F, Fernández-  
53 Frackelton M, Hall RV, Kegg JA. Social media guidelines and best practices: recommendations from the  
54 Council of Residency Directors Social Media Task Force. Western Journal of Emergency Medicine.  
55 2014; 15(1):26.  
56  
57  
58  
59  
60

- 1  
2  
3 38. Geyer E, Irish E, Hagzan A, Wiczulis A. Social Media and Online Professionalism Integrated into  
4 Year 3 OB/GYN Clerkship#. *Medical Reference Services Quarterly*. 2020 Oct 1;39(4):359-69.  
5  
6  
7 39. Nederhof AJ. Methods of coping with social desirability bias: A review. *European journal of*  
8 *social psychology*. 1985; 15(3):263-80.  
9  
10  
11 40. Devotta K, Woodhall-Melnik J, Pedersen C, Wendaferew A, Dowbor TP, Guilcher SJ, Hamilton-  
12 Wright S, Ferentzy P, Hwang SW, Matheson FI. Enriching qualitative research by engaging peer  
13 interviewers: A case study. *Qualitative research*. 2016; 16(6):661-80.  
14  
15  
16  
17  
18  
19  
20  
21  
22  
23  
24  
25  
26  
27  
28

29 *Table 1: Participant Characteristics*

| GPs/ final year                 | Gender[M/F] | Age Category               | Style of                                     |
|---------------------------------|-------------|----------------------------|----------------------------------------------|
| Medical Student                 |             | [20-30], [30-40],<br>[40+] | Interview [face<br>to face, phone,<br>Skype] |
| Interview 1: GP                 | F           | 30-40                      | Phone                                        |
| Interview 2: GP                 | M           | 30-40                      | Phone                                        |
| Interview 3:<br>Medical Student | M           | 20-30                      | Skype                                        |
| Interview 4:<br>Medical Student | M           | 20-30                      | Face-to-face                                 |
| Interview 5:<br>Medical Student | M           | 20-30                      | Face-to-face                                 |

1  
2  
3  
4  
5  
6  
7  
8  
9  
10  
11  
12  
13  
14  
15  
16  
17  
18  
19  
20  
21  
22  
23  
24  
25  
26  
27  
28  
29  
30  
31  
32  
33  
34  
35  
36  
37  
38  
39  
40  
41  
42  
43  
44  
45  
46  
47  
48  
49  
50  
51  
52  
53  
54  
55  
56  
57  
58  
59  
60

|                                 |   |       |              |
|---------------------------------|---|-------|--------------|
| Interview 6:<br>Medical student | F | 30-40 | Face-to-face |
| Interview 7: GP                 | M | 40+   | Face-to-face |
| Interview 8:<br>Medical student | F | 20-30 | Face-to-face |

For peer review only

## COREQ (CONsolidated criteria for REporting Qualitative research) Checklist

A checklist of items that should be included in reports of qualitative research. You must report the page number in your manuscript where you consider each of the items listed in this checklist. If you have not included this information, either revise your manuscript accordingly before submitting or note N/A.

| Topic                                          | Item No. | Guide Questions/Description                                                                                                                              | Reported on Page No. |
|------------------------------------------------|----------|----------------------------------------------------------------------------------------------------------------------------------------------------------|----------------------|
| <b>Domain 1: Research team and reflexivity</b> |          |                                                                                                                                                          |                      |
| <i>Personal characteristics</i>                |          |                                                                                                                                                          |                      |
| Interviewer/facilitator                        | 1        | Which author/s conducted the interview or focus group?                                                                                                   |                      |
| Credentials                                    | 2        | What were the researcher's credentials? E.g. PhD, MD                                                                                                     |                      |
| Occupation                                     | 3        | What was their occupation at the time of the study?                                                                                                      |                      |
| Gender                                         | 4        | Was the researcher male or female?                                                                                                                       |                      |
| Experience and training                        | 5        | What experience or training did the researcher have?                                                                                                     |                      |
| <i>Relationship with participants</i>          |          |                                                                                                                                                          |                      |
| Relationship established                       | 6        | Was a relationship established prior to study commencement?                                                                                              |                      |
| Participant knowledge of the interviewer       | 7        | What did the participants know about the researcher? e.g. personal goals, reasons for doing the research                                                 |                      |
| Interviewer characteristics                    | 8        | What characteristics were reported about the interviewer/facilitator? e.g. Bias, assumptions, reasons and interests in the research topic                |                      |
| <b>Domain 2: Study design</b>                  |          |                                                                                                                                                          |                      |
| <i>Theoretical framework</i>                   |          |                                                                                                                                                          |                      |
| Methodological orientation and Theory          | 9        | What methodological orientation was stated to underpin the study? e.g. grounded theory, discourse analysis, ethnography, phenomenology, content analysis |                      |
| <i>Participant selection</i>                   |          |                                                                                                                                                          |                      |
| Sampling                                       | 10       | How were participants selected? e.g. purposive, convenience, consecutive, snowball                                                                       |                      |
| Method of approach                             | 11       | How were participants approached? e.g. face-to-face, telephone, mail, email                                                                              |                      |
| Sample size                                    | 12       | How many participants were in the study?                                                                                                                 |                      |
| Non-participation                              | 13       | How many people refused to participate or dropped out? Reasons?                                                                                          |                      |
| <i>Setting</i>                                 |          |                                                                                                                                                          |                      |
| Setting of data collection                     | 14       | Where was the data collected? e.g. home, clinic, workplace                                                                                               |                      |
| Presence of non-participants                   | 15       | Was anyone else present besides the participants and researchers?                                                                                        |                      |
| Description of sample                          | 16       | What are the important characteristics of the sample? e.g. demographic data, date                                                                        |                      |
| <i>Data collection</i>                         |          |                                                                                                                                                          |                      |
| Interview guide                                | 17       | Were questions, prompts, guides provided by the authors? Was it pilot tested?                                                                            |                      |
| Repeat interviews                              | 18       | Were repeat interviews carried out? If yes, how many?                                                                                                    |                      |
| Audio/visual recording                         | 19       | Did the research use audio or visual recording to collect the data?                                                                                      |                      |
| Field notes                                    | 20       | Were field notes made during and/or after the interview or focus group?                                                                                  |                      |
| Duration                                       | 21       | What was the duration of the interviews or focus group?                                                                                                  |                      |
| Data saturation                                | 22       | Was data saturation discussed?                                                                                                                           |                      |
| Transcripts returned                           | 23       | Were transcripts returned to participants for comment and/or                                                                                             |                      |

| Topic                                  | Item No. | Guide Questions/Description                                                                                                        | Reported on Page No. |
|----------------------------------------|----------|------------------------------------------------------------------------------------------------------------------------------------|----------------------|
|                                        |          | correction?                                                                                                                        |                      |
| <b>Domain 3: analysis and findings</b> |          |                                                                                                                                    |                      |
| <i>Data analysis</i>                   |          |                                                                                                                                    |                      |
| Number of data coders                  | 24       | How many data coders coded the data?                                                                                               |                      |
| Description of the coding tree         | 25       | Did authors provide a description of the coding tree?                                                                              |                      |
| Derivation of themes                   | 26       | Were themes identified in advance or derived from the data?                                                                        |                      |
| Software                               | 27       | What software, if applicable, was used to manage the data?                                                                         |                      |
| Participant checking                   | 28       | Did participants provide feedback on the findings?                                                                                 |                      |
| <i>Reporting</i>                       |          |                                                                                                                                    |                      |
| Quotations presented                   | 29       | Were participant quotations presented to illustrate the themes/findings?<br>Was each quotation identified? e.g. participant number |                      |
| Data and findings consistent           | 30       | Was there consistency between the data presented and the findings?                                                                 |                      |
| Clarity of major themes                | 31       | Were major themes clearly presented in the findings?                                                                               |                      |
| Clarity of minor themes                | 32       | Is there a description of diverse cases or discussion of minor themes?                                                             |                      |

Developed from: Tong A, Sainsbury P, Craig J. Consolidated criteria for reporting qualitative research (COREQ): a 32-item checklist for interviews and focus groups. *International Journal for Quality in Health Care*. 2007. Volume 19, Number 6: pp. 349 – 357

**Once you have completed this checklist, please save a copy and upload it as part of your submission. DO NOT include this checklist as part of the main manuscript document. It must be uploaded as a separate file.**

1  
2  
3 *Interview Guide*  
4  
5

|                                                                                                                                    |
|------------------------------------------------------------------------------------------------------------------------------------|
| 6 Interview Guide                                                                                                                  |
| 7                                                                                                                                  |
| 8 1. Tell me about your experience of social media.                                                                                |
| 9                                                                                                                                  |
| 10 2. Do you share personal information online such as pictures, location and<br>11 employment status? If yes/no, why?             |
| 12                                                                                                                                 |
| 13 3. Do you use social media for personal or professional use?                                                                    |
| 14                                                                                                                                 |
| 15 4. What do you feel are the benefits of using social media apps?                                                                |
| 16                                                                                                                                 |
| 17 5. What do you feel are the risks associated with the use of social media?                                                      |
| 18                                                                                                                                 |
| 19 6. As a clinician/ future clinician how would you feel about patients contacting<br>20 you/following you on social media?<br>21 |
| 22                                                                                                                                 |

23  
24  
25  
26  
27 *Vignettes*  
28  
29

|                                                                                                                                                                                                                                                                                                                                                                                                                                                                                                                                                                                                                                                                            |
|----------------------------------------------------------------------------------------------------------------------------------------------------------------------------------------------------------------------------------------------------------------------------------------------------------------------------------------------------------------------------------------------------------------------------------------------------------------------------------------------------------------------------------------------------------------------------------------------------------------------------------------------------------------------------|
| 30 Follow up interviews: Vignettes                                                                                                                                                                                                                                                                                                                                                                                                                                                                                                                                                                                                                                         |
| 31                                                                                                                                                                                                                                                                                                                                                                                                                                                                                                                                                                                                                                                                         |
| 32                                                                                                                                                                                                                                                                                                                                                                                                                                                                                                                                                                                                                                                                         |
| 33 1. “Michelle Kelly is a student nurse. She recently posted a photo to twitter showing<br>34 the Accident and Emergency room of the hospital in which she is training on a<br>35 Saturday night. The caption for the photograph was “The crazies are really out<br>36 tonight...”. There were several patients in the photograph, although only one is<br>37 readily identifiable. You see from her feed that she is “friends” with a number of<br>38 former patients on facebook. In a series of posts with one former patient, John, they<br>39 discuss the upsetting nature of the injuries received by an unidentified patient, with<br>40 whom John shared a room”. |
| 41                                                                                                                                                                                                                                                                                                                                                                                                                                                                                                                                                                                                                                                                         |
| 42                                                                                                                                                                                                                                                                                                                                                                                                                                                                                                                                                                                                                                                                         |
| 43                                                                                                                                                                                                                                                                                                                                                                                                                                                                                                                                                                                                                                                                         |
| 44                                                                                                                                                                                                                                                                                                                                                                                                                                                                                                                                                                                                                                                                         |
| 45                                                                                                                                                                                                                                                                                                                                                                                                                                                                                                                                                                                                                                                                         |
| 46                                                                                                                                                                                                                                                                                                                                                                                                                                                                                                                                                                                                                                                                         |
| 47                                                                                                                                                                                                                                                                                                                                                                                                                                                                                                                                                                                                                                                                         |
| 48                                                                                                                                                                                                                                                                                                                                                                                                                                                                                                                                                                                                                                                                         |
| 49                                                                                                                                                                                                                                                                                                                                                                                                                                                                                                                                                                                                                                                                         |
| 50                                                                                                                                                                                                                                                                                                                                                                                                                                                                                                                                                                                                                                                                         |
| 51                                                                                                                                                                                                                                                                                                                                                                                                                                                                                                                                                                                                                                                                         |
| 52                                                                                                                                                                                                                                                                                                                                                                                                                                                                                                                                                                                                                                                                         |
| 53                                                                                                                                                                                                                                                                                                                                                                                                                                                                                                                                                                                                                                                                         |
| 54                                                                                                                                                                                                                                                                                                                                                                                                                                                                                                                                                                                                                                                                         |
| 55 2. “As a senior house officer in a busy surgical outpatients clinic, you consult with a<br>56 young lady who is on the laparoscopy waiting list. She appears disconcerted and<br>57 tells you about a recent you tube video link that was shared with her by a friend.<br>58<br>59<br>60                                                                                                                                                                                                                                                                                                                                                                                |

1  
2  
3  
4  
5  
6  
7  
8  
9  
10  
11  
12  
13  
14  
15  
16  
17  
18  
19  
20  
21  
22  
23  
24  
25  
26  
27  
28  
29  
30  
31  
32  
33  
34  
35  
36  
37  
38  
39  
40  
41  
42  
43  
44  
45  
46  
47  
48  
49  
50  
51  
52  
53  
54  
55  
56  
57  
58  
59  
60

The video involved a group of young men who appeared drunk and were taking turns jumping into a swimming pool after drinking a pint of alcohol. She recognised one of them as the surgical registrar who booked her for her upcoming laparoscopy. She has since found out that the others were also junior doctors in the hospital. She tells you that, although she has no problem with clinicians enjoying themselves, she would not be comfortable with such unprofessional type people having such involvement in her health”.

- How would you approach this problem with the patient?
- What ethical and professional issues arise here?

3. “While on placement in final year of physiotherapy, a friend sends you a screen shot of a blog that one of your classmates is running. The classmate is a very hard working student and has always shared resources with you. The blog is a day by day account of your classmate’s clinical encounters, highlighting learning points and tips for the final year examination. The screenshot is of a paragraph outlining in detail the history of a road traffic accident that led to a client presenting to her. The client’s name is not given but the gender, age, locality and date of accident is documented. The screenshot is followed by this comment from your friend: “no prizes for guessing who this guy is!”

- Would you act on this information? If so, how?
- What ethical and legal dilemmas arise while sharing experiences online?
