# Supplementary material for: ‘Doctors can’t be doctors all of the time’: a qualitative study of how general practitioners and medical students negotiate public-professional and private-personal realms using social media
Source: PubMed Central journal article supplement — BMJ Open. 2021 Oct 19;11(10):e047991. doi: 10.1136/bmjopen-2020-047991 (PMC8527115; doi:10.1136/bmjopen-2020-047991), 2021-10-19
Supplement: bmjopen-2020-047991supp002.pdf [file bmjopen-2020-047991supp002.pdf]

*Interview Guide*

|                                                                                                                     |
|---------------------------------------------------------------------------------------------------------------------|
| Interview Guide                                                                                                     |
| 1. Tell me about your experience of social media.                                                                   |
| 2. Do you share personal information online such as pictures, location and employment status? If yes/no, why?       |
| 3. Do you use social media for personal or professional use?                                                        |
| 4. What do you feel are the benefits of using social media apps?                                                    |
| 5. What do you feel are the risks associated with the use of social media?                                          |
| 6. As a clinician/ future clinician how would you feel about patients contacting you/following you on social media? |

*Vignettes*

|                                                                                                                                                                                                                                                                                                                                                                                                                                                                                                                                                                                                                                                                                                                                                                                                                                                                                                       |
|-------------------------------------------------------------------------------------------------------------------------------------------------------------------------------------------------------------------------------------------------------------------------------------------------------------------------------------------------------------------------------------------------------------------------------------------------------------------------------------------------------------------------------------------------------------------------------------------------------------------------------------------------------------------------------------------------------------------------------------------------------------------------------------------------------------------------------------------------------------------------------------------------------|
| Follow up interviews: Vignettes                                                                                                                                                                                                                                                                                                                                                                                                                                                                                                                                                                                                                                                                                                                                                                                                                                                                       |
| <p>1. “Michelle Kelly is a student nurse. She recently posted a photo to twitter showing the Accident and Emergency room of the hospital in which she is training on a Saturday night. The caption for the photograph was “The crazies are really out tonight...”. There were several patients in the photograph, although only one is readily identifiable. You see from her feed that she is “friends” with a number of former patients on facebook. In a series of posts with one former patient, John, they discuss the upsetting nature of the injuries received by an unidentified patient, with whom John shared a room”.</p> <ul style="list-style-type: none"> <li>• What ethical and professional issues arise here?</li> <li>• Which means of social media are suitable for sharing clinical experiences?</li> <li>• What types of information are unsuitable for social media?</li> </ul> |
| <p>2. “As a senior house officer in a busy surgical outpatients clinic, you consult with a young lady who is on the laparoscopy waiting list. She appears disconcerted and tells you about a recent you tube video link that was shared with her by a friend.</p>                                                                                                                                                                                                                                                                                                                                                                                                                                                                                                                                                                                                                                     |

The video involved a group of young men who appeared drunk and were taking turns jumping into a swimming pool after drinking a pint of alcohol. She recognised one of them as the surgical registrar who booked her for her upcoming laparoscopy. She has since found out that the others were also junior doctors in the hospital. She tells you that, although she has no problem with clinicians enjoying themselves, she would not be comfortable with such unprofessional type people having such involvement in her health”.

- How would you approach this problem with the patient?
- What ethical and professional issues arise here?

3. “While on placement in final year of physiotherapy, a friend sends you a screenshot of a blog that one of your classmates is running. The classmate is a very hard working student and has always shared resources with you. The blog is a day by day account of your classmate’s clinical encounters, highlighting learning points and tips for the final year examination. The screenshot is of a paragraph outlining in detail the history of a road traffic accident that led to a client presenting to her. The client’s name is not given but the gender, age, locality and date of accident is documented. The screenshot is followed by this comment from your friend: “no prizes for guessing who this guy is!”

- Would you act on this information? If so, how?
- What ethical and legal dilemmas arise while sharing experiences online?
